# Supplementary material for: Oxygenolysis of a series of copper(ii)-flavonolate adducts varying the electronic factors on supporting ligands as a mimic of quercetin 2,4-dioxygenase-like activity
Source: Royal Society of Chemistry journal article supplement (doi:10.1039/d1dt04151g), 2022-01-01
Supplement: d1dt04151g1.pdf [file d1dt04151g1.pdf]

## **Supporting Information**

### **Oxygenolysis of a series of copper(II)-flavonolate adducts varying the electronic factors on supporting ligands as a mimic of quercetin 2,4-dioxygenase-like activity**

Nirmalya Podder,<sup>a</sup> Subhasis Dey,<sup>a</sup> Anakuthil Anoop,<sup>a\*</sup> and Sukanta Mandal<sup>a\*</sup>

<sup>a</sup>Department of Chemistry, Indian Institute of Technology Kharagpur, Kharagpur 721302, India.

E-mail: [sukanta.mandal@chem.iitkgp.ac.in](mailto:sukanta.mandal@chem.iitkgp.ac.in)

[anoop@chem.iitkgp.ac.in](mailto:anoop@chem.iitkgp.ac.in)

| <b>Table of contents</b>                                                             | <b>Page no.</b> |
|--------------------------------------------------------------------------------------|-----------------|
| Table S1                                                                             | S3              |
| Table S2                                                                             | S4              |
| Scheme S1, Scheme S2                                                                 | S5              |
| Figure S1, Figure S2                                                                 | S6              |
| Figure S3, Figure S4                                                                 | S7              |
| Figure S5, Figure S6                                                                 | S8              |
| Figure S7, Figure S8                                                                 | S9              |
| Figure S9, Figure S10                                                                | S10             |
| Figure S11, Figure S12                                                               | S11             |
| Figure S13, Figure S14                                                               | S12             |
| Figure S15, Figure S16                                                               | S13             |
| Table S3 – Table S6                                                                  | S14             |
| Figure S17                                                                           | S15             |
| Determination of equilibrium constant ( $K_{eq}$ ) from spectrophotometric titration | S15 – S17       |
| Figure S18                                                                           | S17             |
| Figure S19, Figure S20                                                               | S18             |
| Figure S21, Figure S22                                                               | S19             |
| Figure S23, Figure S24                                                               | S20             |
| Figure S25, Figure S26                                                               | S21             |
| Table S7, Figure S27, Figure S28                                                     | S22             |
| Figure S29, Figure S30                                                               | S23             |
| Figure S31, Figure S32                                                               | S24             |
| Figure S33, Table S8                                                                 | S25             |
| Figure S34                                                                           | S26             |
| Figure S35, Figure S36                                                               | S27             |
| Figure S37, Table S9                                                                 | S28             |
| Figure S38, Figure S39                                                               | S29             |
| Figure S40, Table S10                                                                | S30             |
| Table S11 – Table S21                                                                | S31 – S44       |

**Table S1.** Data collection and structure refinement parameters for **I·2H<sub>2</sub>O**, **II·MeOH**, **III·2H<sub>2</sub>O** and **IV·MeOH**

|                                                                  | <b>I·2H<sub>2</sub>O</b>                                                                     | <b>II·MeOH</b>                                                                               | <b>III·2H<sub>2</sub>O</b>                                                                   | <b>IV·MeOH</b>                                                                               |
|------------------------------------------------------------------|----------------------------------------------------------------------------------------------|----------------------------------------------------------------------------------------------|----------------------------------------------------------------------------------------------|----------------------------------------------------------------------------------------------|
| CCDC                                                             | 2112719                                                                                      | 2112720                                                                                      | 2112721                                                                                      | 2112723                                                                                      |
| Chemical formula                                                 | C <sub>23</sub> H <sub>27</sub> CuN <sub>3</sub> O <sub>7</sub>                              | C <sub>23</sub> H <sub>25</sub> CuN <sub>3</sub> O <sub>5</sub>                              | C <sub>22</sub> H <sub>24</sub> ClCuN <sub>3</sub> O <sub>6</sub>                            | C <sub>23</sub> H <sub>24</sub> CuN <sub>4</sub> O <sub>7</sub>                              |
| Formula weight                                                   | 521.02                                                                                       | 487.01                                                                                       | 525.44                                                                                       | 532.01                                                                                       |
| Temperature (K)                                                  | 296(2)                                                                                       | 296(2)                                                                                       | 296(2)                                                                                       | 296(2)                                                                                       |
| $\lambda$ (Å)                                                    | <i>Mo-K<math>\alpha</math></i> (0.71073)                                                     | <i>Mo-K<math>\alpha</math></i> (0.71073)                                                     | <i>Mo-K<math>\alpha</math></i> (0.71073)                                                     | <i>Mo-K<math>\alpha</math></i> (0.71073)                                                     |
| Crystal system                                                   | Triclinic                                                                                    | Monoclinic                                                                                   | Triclinic                                                                                    | Triclinic                                                                                    |
| Space group                                                      | <i>P</i> $\bar{1}$ ( <i>no. 2</i> )                                                          | <i>P</i> 2 <sub>1</sub> / <i>n</i> ( <i>no. 14</i> )                                         | <i>P</i> $\bar{1}$ ( <i>no. 2</i> )                                                          | <i>P</i> $\bar{1}$ ( <i>no. 2</i> )                                                          |
| <i>a</i> (Å)                                                     | 8.7650(10)                                                                                   | 17.329(5)                                                                                    | 8.735(4)                                                                                     | 8.813(7)                                                                                     |
| <i>b</i> (Å)                                                     | 10.2565(12)                                                                                  | 11.650(3)                                                                                    | 10.000(4)                                                                                    | 10.131(5)                                                                                    |
| <i>c</i> (Å)                                                     | 13.7578(15)                                                                                  | 24.282(6)                                                                                    | 13.704(6)                                                                                    | 14.050(12)                                                                                   |
| $\alpha$ (°)                                                     | 85.880(3)                                                                                    | 90                                                                                           | 85.767(14)                                                                                   | 87.22(4)                                                                                     |
| $\beta$ (°)                                                      | 74.947(3)                                                                                    | 109.405(13)                                                                                  | 76.846(12)                                                                                   | 77.53(5)                                                                                     |
| $\gamma$ (°)                                                     | 75.207(3)                                                                                    | 90                                                                                           | 73.237(12)                                                                                   | 72.62(4)                                                                                     |
| <i>V</i> (Å <sup>3</sup> )                                       | 1154.8(2)                                                                                    | 4624(2)                                                                                      | 1116.0(8)                                                                                    | 1168.8(15)                                                                                   |
| <i>Z</i>                                                         | 2                                                                                            | 8                                                                                            | 2                                                                                            | 2                                                                                            |
| <i>D<sub>c</sub></i> (g cm <sup>-3</sup> )                       | 1.493                                                                                        | 1.396                                                                                        | 1.552                                                                                        | 1.509                                                                                        |
| $\mu$ (mm <sup>-1</sup> )                                        | 0.995                                                                                        | 0.983                                                                                        | 1.143                                                                                        | 0.986                                                                                        |
| Reflections measured                                             | 15646                                                                                        | 135862                                                                                       | 12242                                                                                        | 13441                                                                                        |
| Unique reflections [ <i>R</i> <sub>int</sub> ]                   | 5310 [0.0341]                                                                                | 11412 [0.0564]                                                                               | 3635 [0.0669]                                                                                | 5953 [0.0271]                                                                                |
| Number of reflections used [ <i>I</i> > 2 $\sigma$ ( <i>I</i> )] | 4636                                                                                         | 7707                                                                                         | 2808                                                                                         | 4860                                                                                         |
| Number of parameters                                             | 324                                                                                          | 579                                                                                          | 307                                                                                          | 317                                                                                          |
| Final <i>R</i> indices                                           | <sup>a</sup> <i>R</i> <sub>1</sub> = 0.0387;<br><sup>b</sup> <i>wR</i> <sub>2</sub> = 0.1057 | <sup>a</sup> <i>R</i> <sub>1</sub> = 0.0426;<br><sup>b</sup> <i>wR</i> <sub>2</sub> = 0.1103 | <sup>a</sup> <i>R</i> <sub>1</sub> = 0.0729;<br><sup>b</sup> <i>wR</i> <sub>2</sub> = 0.2063 | <sup>a</sup> <i>R</i> <sub>1</sub> = 0.0514;<br><sup>b</sup> <i>wR</i> <sub>2</sub> = 0.1528 |
| <i>R</i> indices (all data)                                      | <sup>a</sup> <i>R</i> <sub>1</sub> = 0.0452;<br><sup>b</sup> <i>wR</i> <sub>2</sub> = 0.1132 | <sup>a</sup> <i>R</i> <sub>1</sub> = 0.0787;<br><sup>b</sup> <i>wR</i> <sub>2</sub> = 0.1380 | <sup>a</sup> <i>R</i> <sub>1</sub> = 0.0947;<br><sup>b</sup> <i>wR</i> <sub>2</sub> = 0.2506 | <sup>a</sup> <i>R</i> <sub>1</sub> = 0.0642;<br><sup>b</sup> <i>wR</i> <sub>2</sub> = 0.1616 |
| Goodness-of-fit on <i>F</i> <sup>2</sup>                         | 1.070                                                                                        | 1.079                                                                                        | 1.192                                                                                        | 1.062                                                                                        |
| Largest residual peak and hole (e.Å <sup>-3</sup> )              | 0.667 and -0.627                                                                             | 0.566 and -0.589                                                                             | 0.955 and -2.278                                                                             | 0.675 and -0.421                                                                             |

$$^aR_1 = \Sigma(|F_o| - |F_c|)/\Sigma|F_o|. \quad ^b wR_2 = \{\Sigma[w(|F_o|^2 - |F_c|^2)^2]/\Sigma[w(|F_o|^2)^2]\}^{1/2}.$$

**Table S2.** Data collection and structure refinement parameters for **1·CH<sub>2</sub>Cl<sub>2</sub>·1.5H<sub>2</sub>O**, **2·CH<sub>2</sub>Cl<sub>2</sub>·H<sub>2</sub>O** and **5·2H<sub>2</sub>O**.

|                                                                  | <b>1·CH<sub>2</sub>Cl<sub>2</sub>·1.5H<sub>2</sub>O</b>                                   | <b>2·CH<sub>2</sub>Cl<sub>2</sub>·H<sub>2</sub>O</b>                                      | <b>5·2H<sub>2</sub>O</b>                                                                  |
|------------------------------------------------------------------|-------------------------------------------------------------------------------------------|-------------------------------------------------------------------------------------------|-------------------------------------------------------------------------------------------|
| CCDC                                                             | 2112724                                                                                   | 2112725                                                                                   | 2112726                                                                                   |
| Chemical formula                                                 | 2(C <sub>37</sub> H <sub>34</sub> Cl <sub>2</sub> CuN <sub>3</sub> O <sub>7.5</sub> )     | C <sub>36</sub> H <sub>31</sub> Cl <sub>2</sub> CuN <sub>3</sub> O <sub>6</sub>           | C <sub>36</sub> H <sub>33</sub> N <sub>3</sub> O <sub>8</sub> Zn                          |
| Formula weight                                                   | 2*(775.13)                                                                                | 736.10                                                                                    | 701.04                                                                                    |
| Temperature (K)                                                  | 296(2)                                                                                    | 296(2)                                                                                    | 296(2)                                                                                    |
| $\lambda$ (Å)                                                    | Mo-K $\alpha$ (0.71073)                                                                   | Mo-K $\alpha$ (0.71073)                                                                   | Mo-K $\alpha$ (0.71073)                                                                   |
| Crystal system                                                   | Monoclinic                                                                                | Monoclinic                                                                                | Monoclinic                                                                                |
| Space group                                                      | <i>C2/c</i> (no. 15)                                                                      | <i>P2<sub>1</sub>/c</i> (no. 14)                                                          | <i>P2<sub>1</sub>/c</i> (no. 14)                                                          |
| <i>a</i> (Å)                                                     | 38.679(14)                                                                                | 16.4553(11)                                                                               | 17.50(2)                                                                                  |
| <i>b</i> (Å)                                                     | 12.824(4)                                                                                 | 9.4294(6)                                                                                 | 21.47(3)                                                                                  |
| <i>c</i> (Å)                                                     | 15.166(5)                                                                                 | 20.5153(14)                                                                               | 8.797(17)                                                                                 |
| $\alpha$ (°)                                                     | 90                                                                                        | 90                                                                                        | 90                                                                                        |
| $\beta$ (°)                                                      | 108.650(9)                                                                                | 90.578(2)                                                                                 | 91.34(5)                                                                                  |
| $\gamma$ (°)                                                     | 90                                                                                        | 90                                                                                        | 90                                                                                        |
| <i>V</i> (Å <sup>3</sup> )                                       | 7127(4)                                                                                   | 3183.1(4)                                                                                 | 3304(9)                                                                                   |
| <i>Z</i>                                                         | 4                                                                                         | 4                                                                                         | 4                                                                                         |
| <i>D<sub>c</sub></i> (g cm <sup>-3</sup> )                       | 1.439                                                                                     | 1.532                                                                                     | 1.401                                                                                     |
| $\mu$ (mm <sup>-1</sup> )                                        | 0.818                                                                                     | 0.908                                                                                     | 0.800                                                                                     |
| Reflections measured                                             | 131686                                                                                    | 36525                                                                                     | 27282                                                                                     |
| Unique reflections [ <i>R</i> <sub>int</sub> ]                   | 7263 [0.0610]                                                                             | 5586 [0.0928]                                                                             | 8099 [0.0997]                                                                             |
| Number of reflections used [ <i>I</i> > 2 $\sigma$ ( <i>I</i> )] | 5879                                                                                      | 3853                                                                                      | 3071                                                                                      |
| Number of parameters                                             | 456                                                                                       | 427                                                                                       | 433                                                                                       |
| Final R indices                                                  | <sup>a</sup> <i>R</i> <sub>1</sub> = 0.0502; <sup>b</sup> <i>wR</i> <sub>2</sub> = 0.1454 | <sup>a</sup> <i>R</i> <sub>1</sub> = 0.0570; <sup>b</sup> <i>wR</i> <sub>2</sub> = 0.1511 | <sup>a</sup> <i>R</i> <sub>1</sub> = 0.0791; <sup>b</sup> <i>wR</i> <sub>2</sub> = 0.1942 |
| R indices (all data)                                             | <sup>a</sup> <i>R</i> <sub>1</sub> = 0.0651; <sup>b</sup> <i>wR</i> <sub>2</sub> = 0.1666 | <sup>a</sup> <i>R</i> <sub>1</sub> = 0.0869; <sup>b</sup> <i>wR</i> <sub>2</sub> = 0.1733 | <sup>a</sup> <i>R</i> <sub>1</sub> = 0.2111; <sup>b</sup> <i>wR</i> <sub>2</sub> = 0.2674 |
| Goodness-of-fit on <i>F</i> <sup>2</sup>                         | 1.021                                                                                     | 1.058                                                                                     | 1.011                                                                                     |
| Largest residual peak and hole (e.Å <sup>-3</sup> )              | 1.157 and -0.667                                                                          | 0.630 and -0.865                                                                          | 0.699 and -0.408                                                                          |

$$^a R_1 = \Sigma(|F_o| - |F_c|) / \Sigma |F_o|. \quad ^b wR_2 = \{ \Sigma [w(|F_o|^2 - |F_c|^2)^2] / \Sigma [w(|F_o|^2)^2] \}^{1/2}.$$

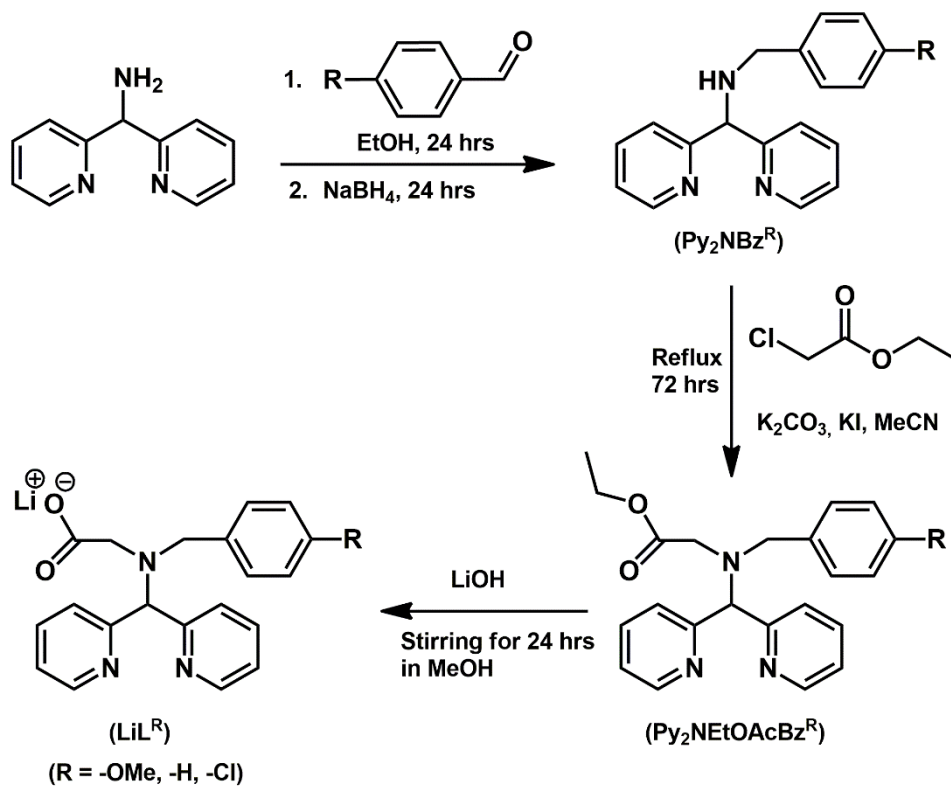

**Scheme S1.** General synthetic route of ligands LiL<sup>R</sup> (R = -OMe, -H, -Cl).

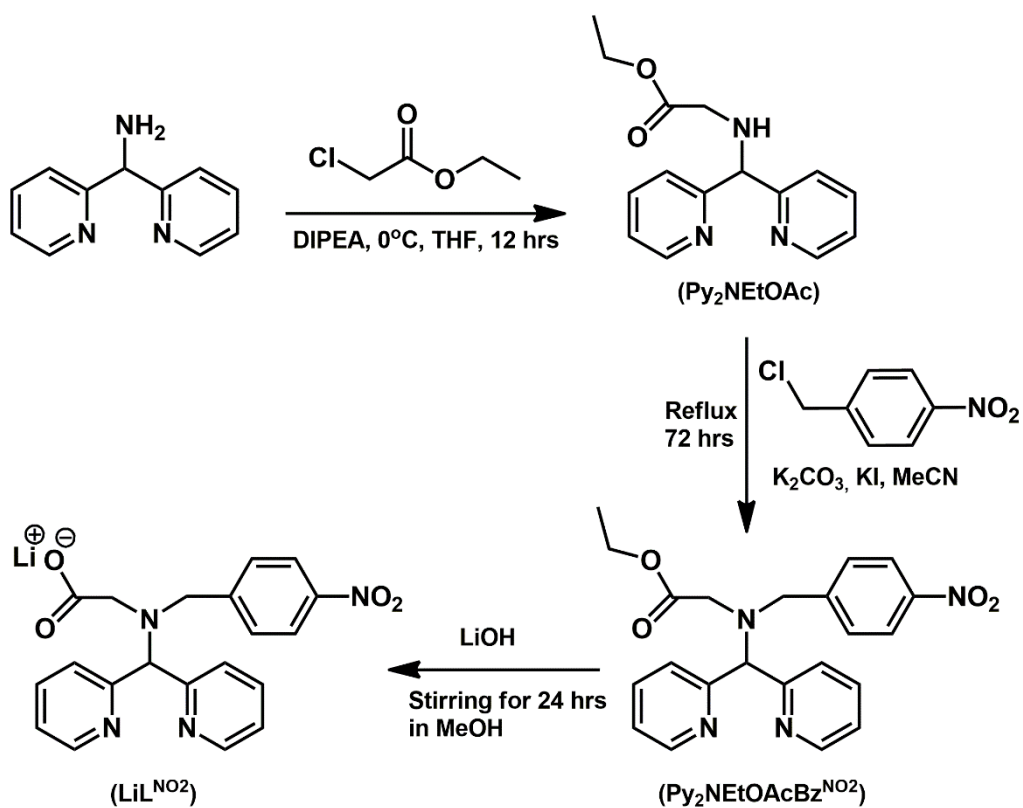

**Scheme S2.** Synthetic route of ligand LiL<sup>NO2</sup>.

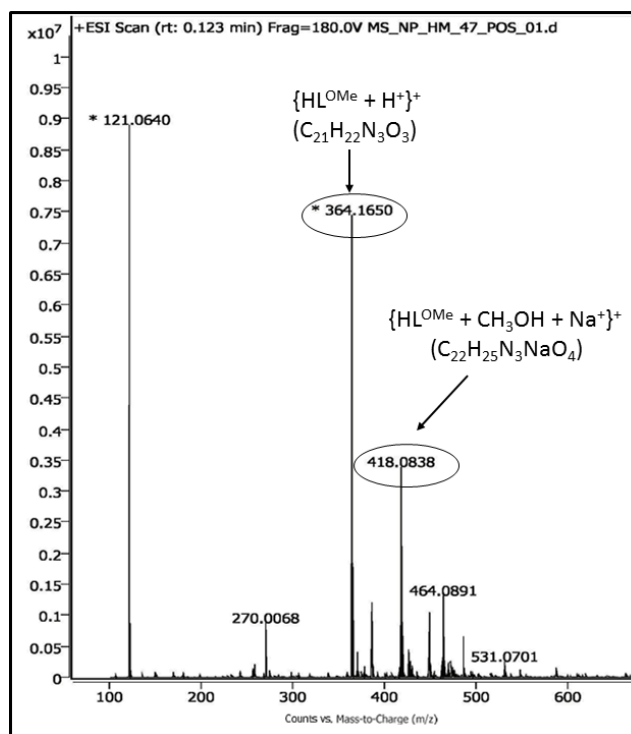

**Figure S1.** HRMS-ESI(+) spectrum of ligand  $\text{LiL}^{\text{OMe}}$  in methanol with a trace quantity of  $\text{HCOOH}$ .

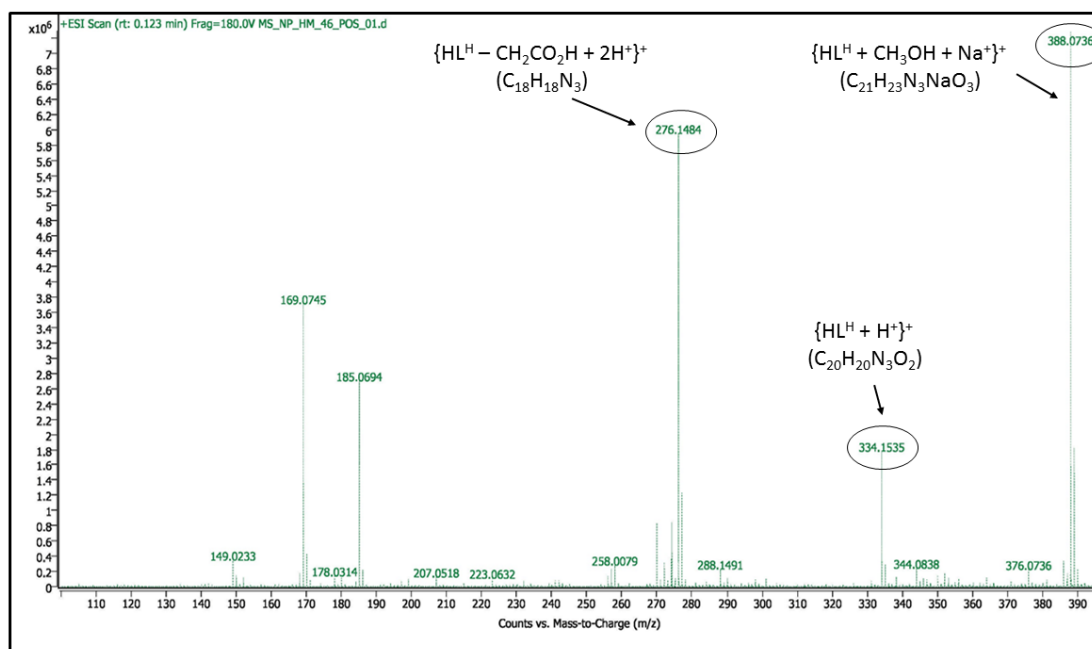

**Figure S2.** HRMS-ESI(+) spectrum of ligand  $\text{LiL}^{\text{H}}$  in methanol with a trace quantity of  $\text{HCOOH}$ .

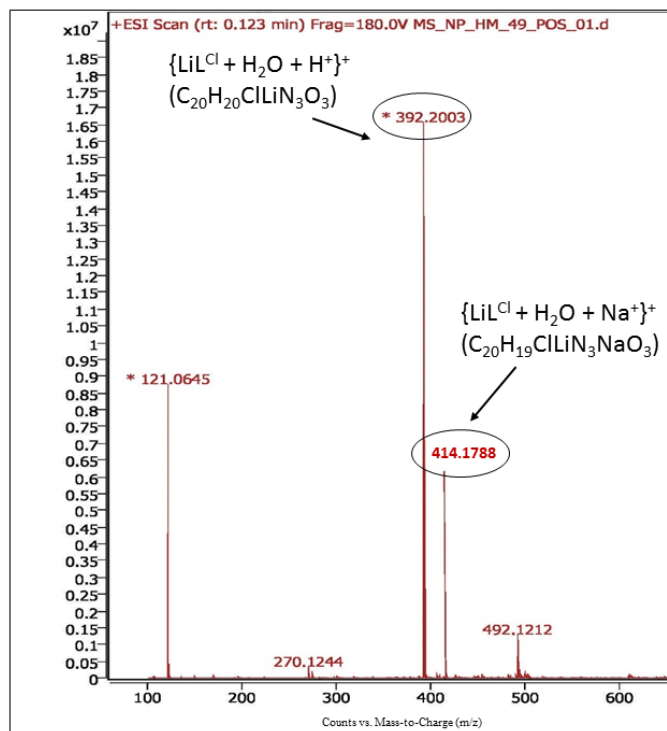

**Figure S3.** HRMS-ESI(+) spectrum of ligand  $\text{LiL}^{\text{Cl}}$  in methanol with a trace quantity of  $\text{HCOOH}$ .

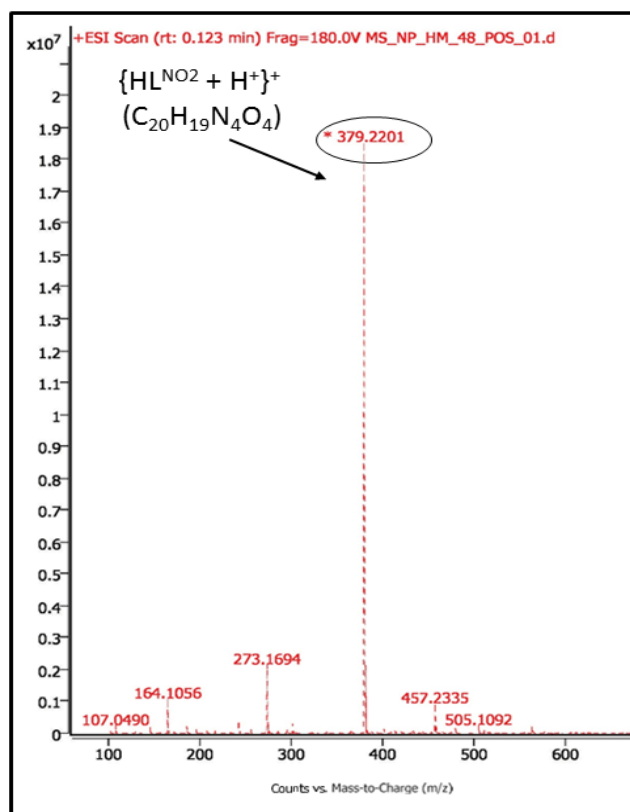

**Figure S4.** HRMS-ESI(+) spectrum of ligand  $\text{LiL}^{\text{NO}_2}$  in methanol with a trace quantity of  $\text{HCOOH}$ .

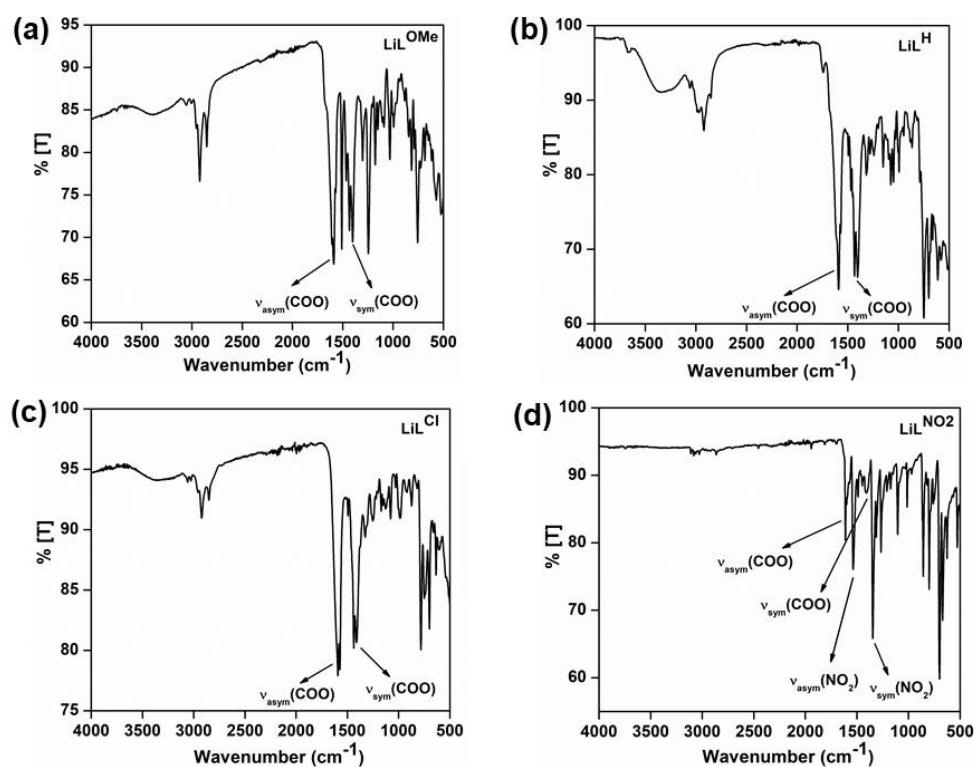

**Figure S5.** ATR-FTIR spectra (solid samples) of the lithium salts of ligands: (a)  $\text{LiL}^{\text{OMe}}$ ; (b)  $\text{LiL}^{\text{H}}$ ; (c)  $\text{LiL}^{\text{Cl}}$  and (d)  $\text{LiL}^{\text{NO}_2}$ .

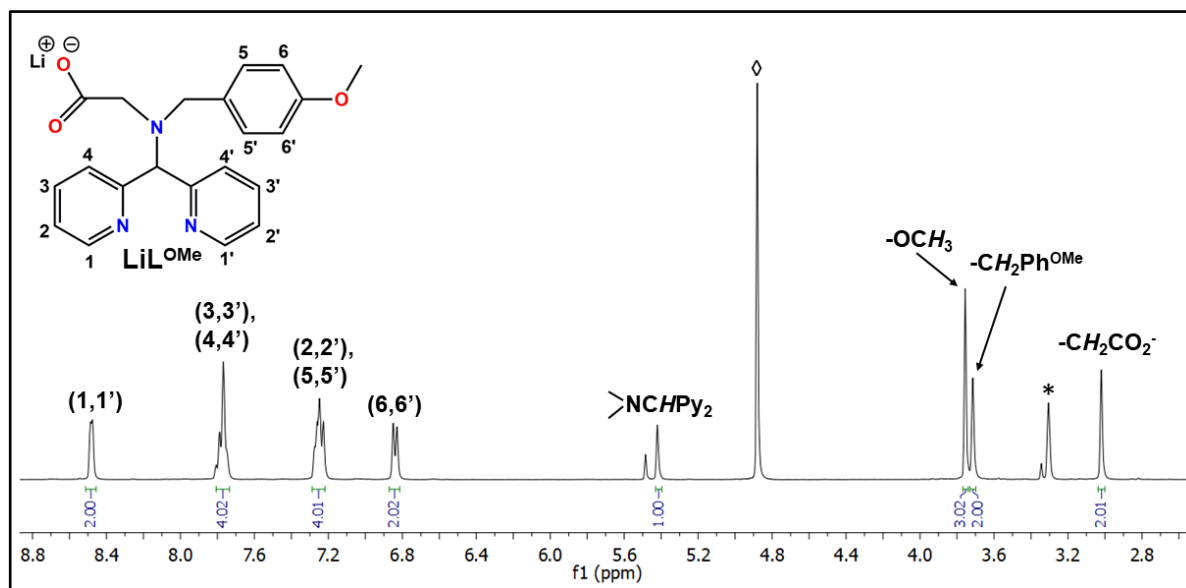

**Figure S6.**  $^1\text{H}$  NMR (400 MHz,  $\text{CD}_3\text{OD}$ , 300 K) spectrum of ligand  $\text{LiL}^{\text{OMe}}$ . Symbols ( $\diamond$ ) and (\*) denote water and solvent residual peaks, respectively.



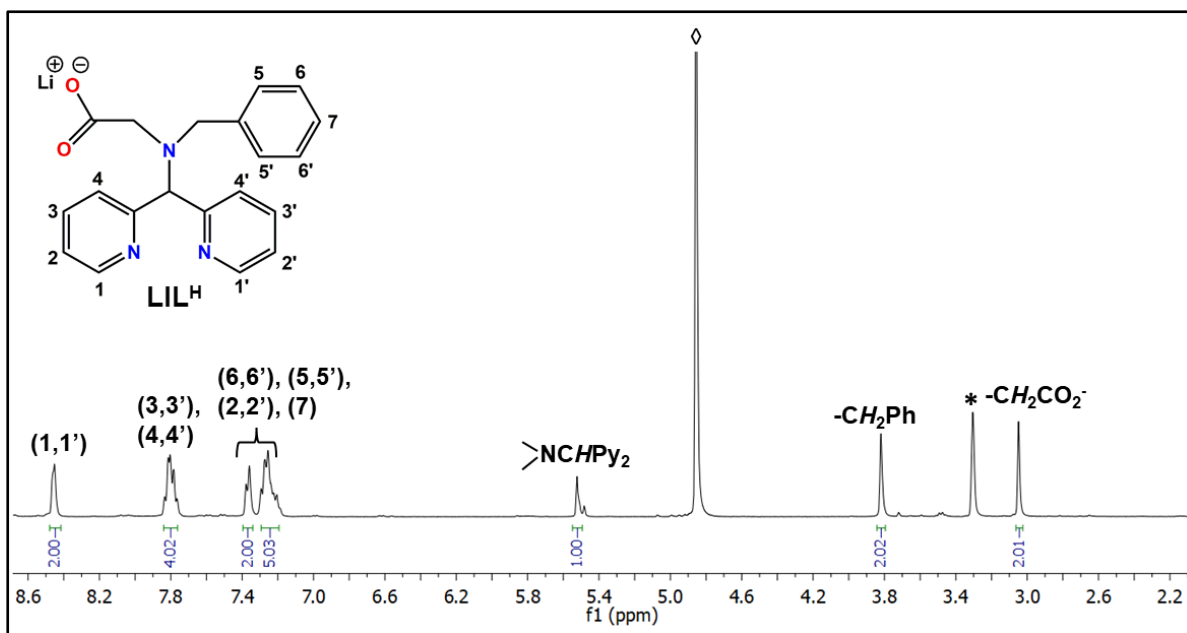

**Figure S7.**  $^1\text{H}$  NMR (400 MHz,  $\text{CD}_3\text{OD}$ , 300 K) spectrum of ligand  $\text{LiL}^{\text{H}}$ . Symbols ( $\diamond$ ) and (\*) denote water and solvent residual peaks, respectively.

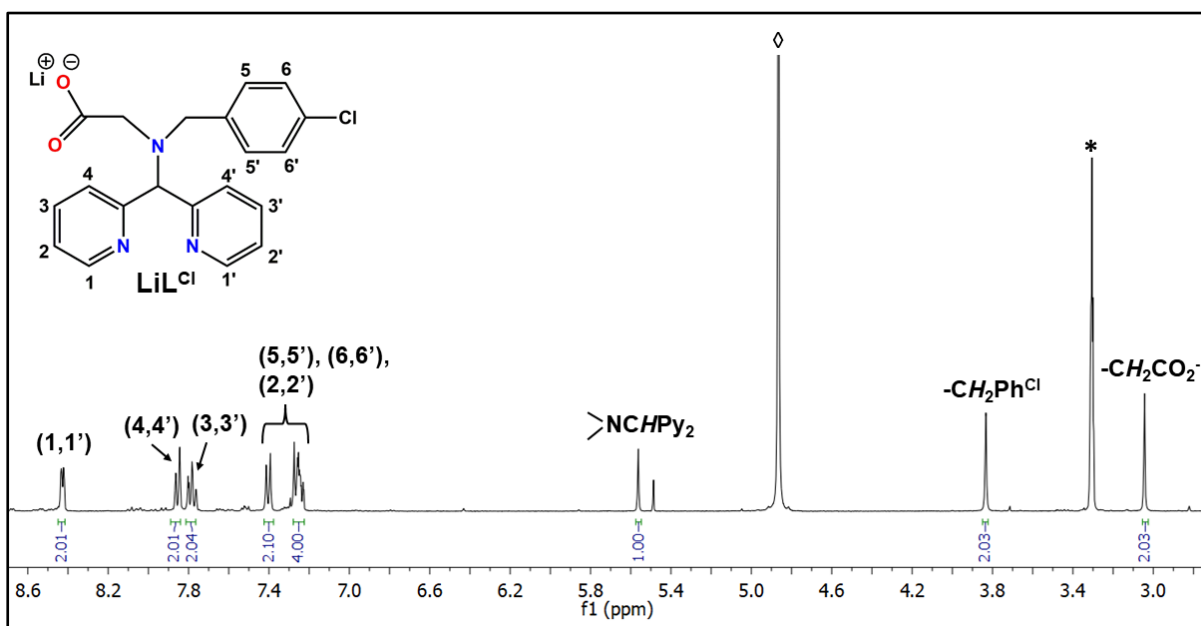

**Figure S8.**  $^1\text{H}$  NMR (400 MHz,  $\text{CD}_3\text{OD}$ , 300 K) spectrum of ligand  $\text{LiL}^{\text{Cl}}$ . Symbols ( $\diamond$ ) and (\*) denote water and solvent residual peaks, respectively.

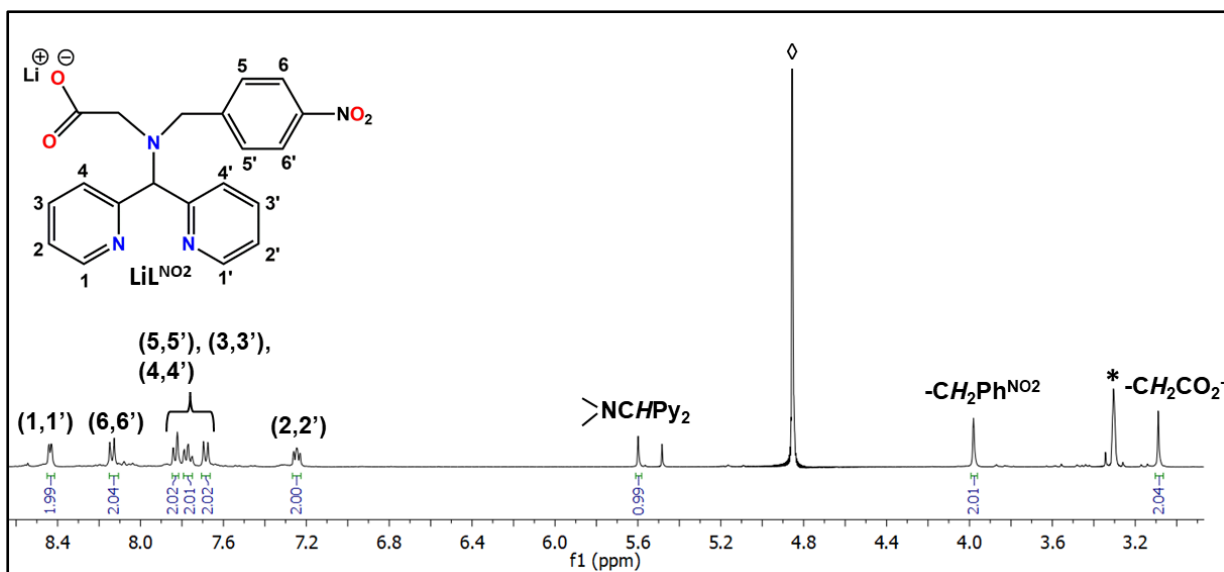

**Figure S9.**  $^1\text{H}$  NMR (400 MHz,  $\text{CD}_3\text{OD}$ , 300 K) spectrum of ligand  $\text{LiL}^{\text{NO}_2}$ . Symbols ( $\diamond$ ) and (\*) denote water and solvent residual peaks, respectively.

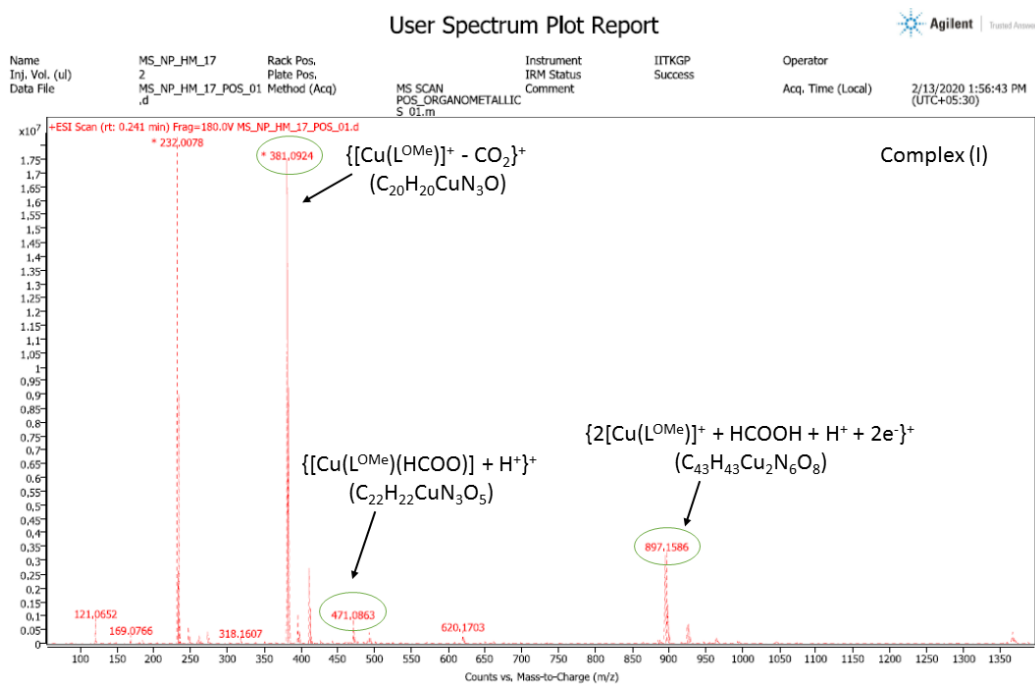

**Figure S10.** HRMS-ESI(+) spectrum of  $[\text{Cu}(\text{LOMe})(\text{OAc})]$  (**I**) in methanol with a trace quantity of  $\text{HCOOH}$ .

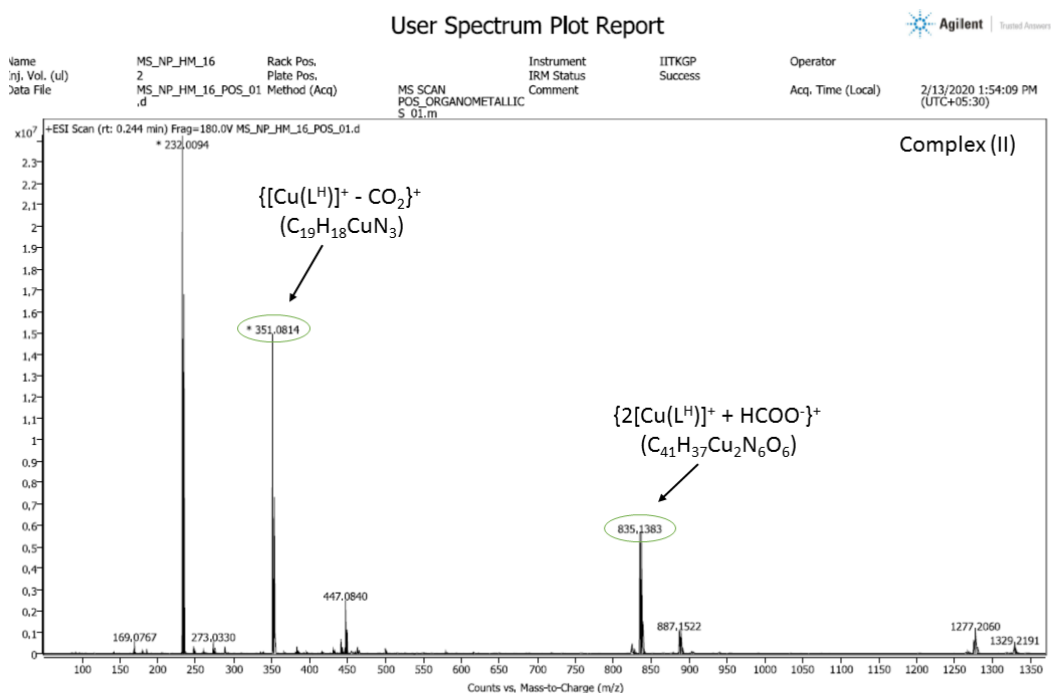

**Figure S11.** HRMS-ESI(+) spectrum of  $[\text{Cu}(\text{L}^{\text{H}})(\text{OAc})]$  (**II**) in methanol with a trace quantity of  $\text{HCOOH}$ .

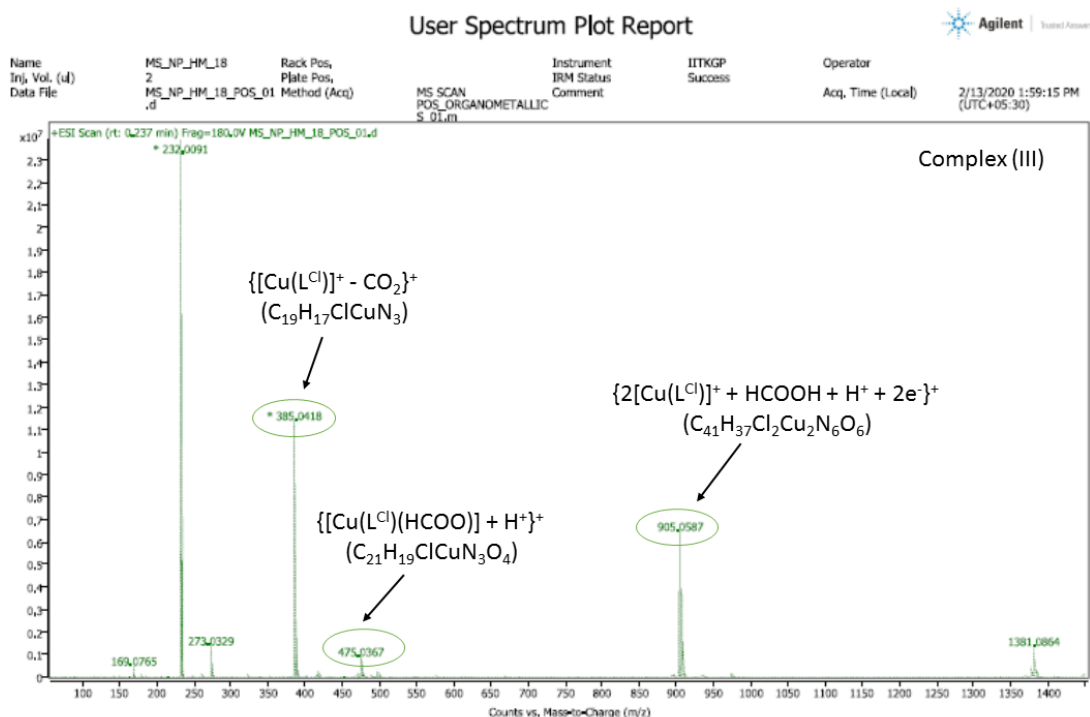

**Figure S12.** HRMS-ESI(+) spectrum of  $[\text{Cu}(\text{L}^{\text{Cl}})(\text{OAc})]$  (**III**) in methanol with a trace quantity of  $\text{HCOOH}$ .

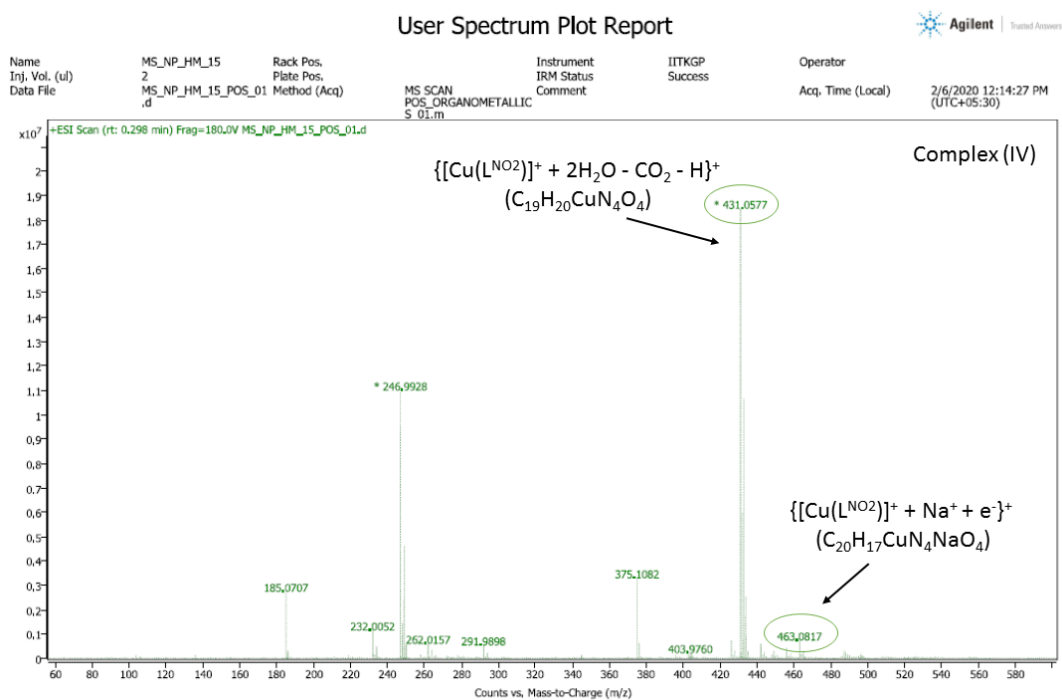

**Figure S13.** HRMS-ESI(+) spectrum of  $[\text{Cu}(\text{L}^{\text{NO}_2})(\text{OAc})]$  (**IV**) in methanol with a trace quantity of  $\text{HCOOH}$ .

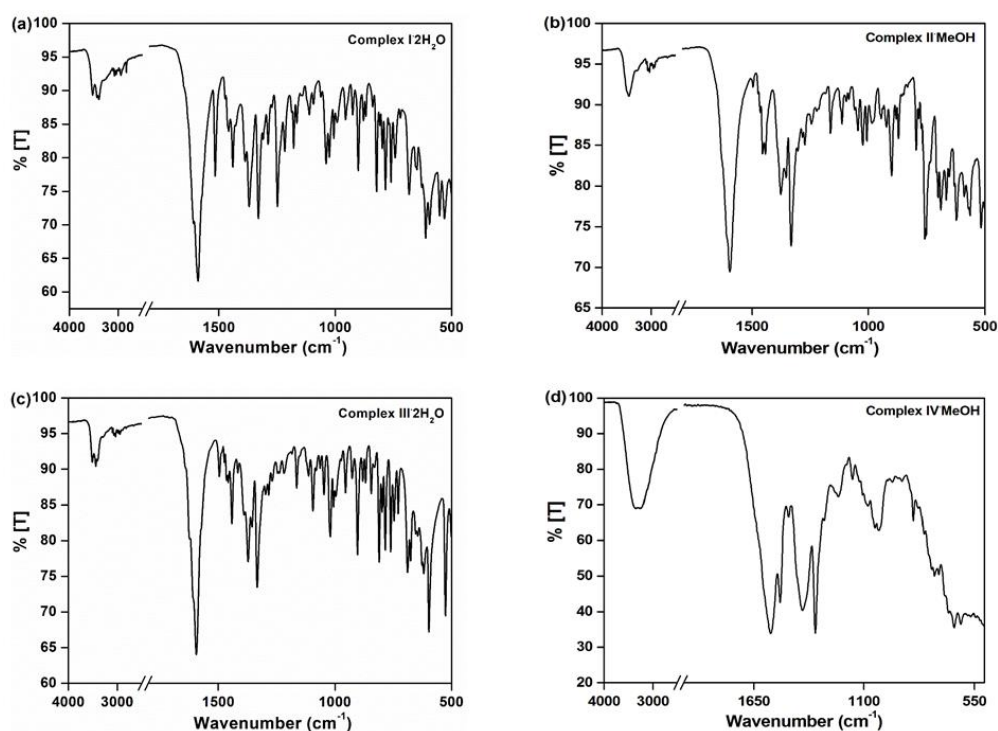

**Figure S14.** ATR-FTIR spectra (solid samples) of acetate-bound copper(II) complexes: (a)  $[\text{Cu}(\text{L}^{\text{OMe}})(\text{OAc})] \cdot 2\text{H}_2\text{O}$  (**I** $\cdot 2\text{H}_2\text{O}$ ); (b)  $[\text{Cu}(\text{L}^{\text{H}})(\text{OAc})] \cdot \text{MeOH}$  (**II** $\cdot \text{MeOH}$ ); (c)  $[\text{Cu}(\text{L}^{\text{Cl}})(\text{OAc})] \cdot 2\text{H}_2\text{O}$  (**III** $\cdot 2\text{H}_2\text{O}$ ) and (d)  $[\text{Cu}(\text{L}^{\text{NO}_2})(\text{OAc})] \cdot \text{MeOH}$  (**IV** $\cdot \text{MeOH}$ ).

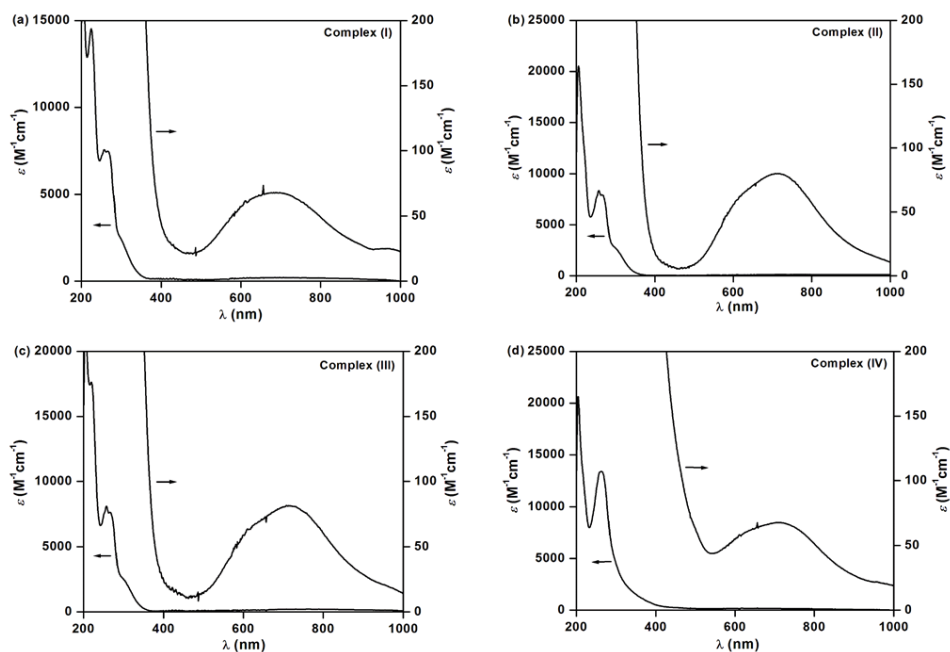

**Figure S15.** UV-vis spectra of the acetate-bound copper(II) complexes in methanol: (a)  $[\text{Cu}(\text{L}^{\text{OMe}})(\text{OAc})]\cdot 2\text{H}_2\text{O}$  (**I** $\cdot 2\text{H}_2\text{O}$ ); (b)  $[\text{Cu}(\text{L}^{\text{H}})(\text{OAc})]\cdot \text{MeOH}$  (**II** $\cdot \text{MeOH}$ ); (c)  $[\text{Cu}(\text{L}^{\text{Cl}})(\text{OAc})]\cdot 2\text{H}_2\text{O}$  (**III** $\cdot 2\text{H}_2\text{O}$ ) and (d)  $[\text{Cu}(\text{L}^{\text{NO}_2})(\text{OAc})]\cdot \text{MeOH}$  (**IV** $\cdot \text{MeOH}$ ).

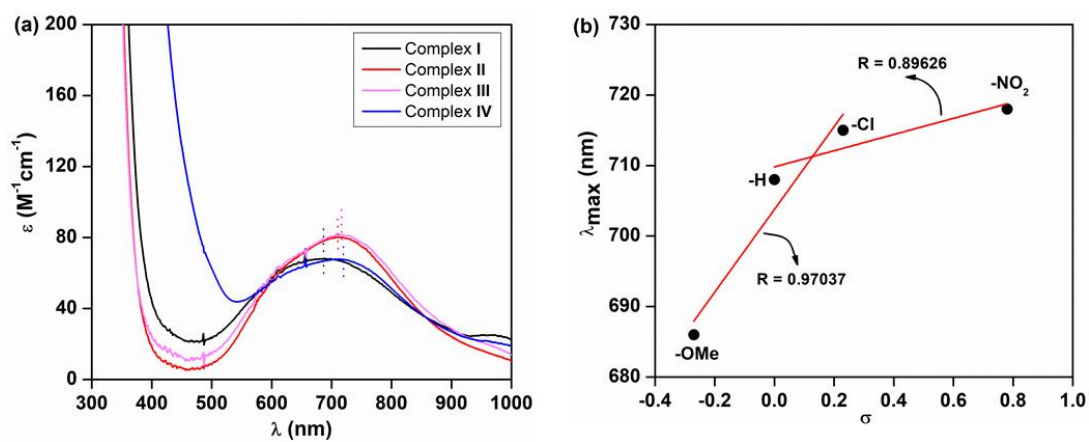

**Figure S16.** (a) Electronic absorption spectra of the complexes  $[\text{Cu}(\text{L}^{\text{R}})(\text{OAc})]$  (**I-IV**) in MeOH (only  $d-d$  bands are shown). (b) Plot of  $\lambda_{\text{max}}$  values of the  $d-d$  bands of  $[\text{Cu}(\text{L}^{\text{R}})(\text{OAc})]$  (**I-IV**) versus Hammett constants  $\sigma$ .

|            |            |                 |           |
|------------|------------|-----------------|-----------|
| Cu(1)–N(1) | 2.0442(19) | N(1)–Cu(1)–N(2) | 81.33(8)  |
| Cu(1)–N(2) | 2.0124(18) | N(1)–Cu(1)–N(3) | 77.91(7)  |
| Cu(1)–N(3) | 2.3571(19) | N(2)–Cu(1)–N(3) | 83.58(7)  |
| Cu(1)–O(1) | 1.9464(16) | N(1)–Cu(1)–O(1) | 84.30(7)  |
| Cu(1)–O(3) | 1.9418(17) | N(1)–Cu(1)–O(3) | 178.54(7) |
|            |            | N(2)–Cu(1)–O(1) | 163.42(8) |
|            |            | N(2)–Cu(1)–O(3) | 100.10(8) |
|            |            | N(3)–Cu(1)–O(1) | 101.47(7) |
|            |            | N(3)–Cu(1)–O(3) | 102.50(7) |
|            |            | O(1)–Cu(1)–O(3) | 94.24(7)  |

|                   |            |                   |            |
|-------------------|------------|-------------------|------------|
| Cu(1)–N(1a)       | 2.056(2)   | Cu(2)–N(1b)       | 2.049(2)   |
| Cu(1)–N(2a)       | 2.014(2)   | Cu(2)–N(2b)       | 2.026(2)   |
| Cu(1)–N(3a)       | 2.402(3)   | Cu(2)–N(3b)       | 2.508(2)   |
| Cu(1)–O(1a)       | 1.937(2)   | Cu(2)–O(1b)       | 1.9347(19) |
| Cu(1)–O(3a)       | 1.948(2)   | Cu(2)–O(3b)       | 1.966(2)   |
| N(1a)–Cu(1)–N(2a) | 81.67(10)  | N(1b)–Cu(2)–N(2b) | 82.39(9)   |
| N(1a)–Cu(1)–N(3a) | 77.06(9)   | N(1b)–Cu(2)–N(3b) | 74.60(8)   |
| N(2a)–Cu(1)–N(3a) | 83.37(9)   | N(2b)–Cu(2)–N(3b) | 84.12(8)   |
| N(1a)–Cu(1)–O(1a) | 83.98(9)   | N(1b)–Cu(2)–O(1b) | 85.41(8)   |
| N(1a)–Cu(1)–O(3a) | 177.09(10) | N(1b)–Cu(2)–O(3b) | 175.98(8)  |
| N(2a)–Cu(1)–O(1a) | 165.22(10) | N(2b)–Cu(2)–O(1b) | 167.51(8)  |
| N(2a)–Cu(1)–O(3a) | 99.10(10)  | N(2b)–Cu(2)–O(3b) | 95.09(9)   |
| N(3a)–Cu(1)–O(1a) | 96.86(10)  | N(3b)–Cu(2)–O(1b) | 90.07(8)   |
| N(3a)–Cu(1)–O(3a) | 105.81(10) | N(3b)–Cu(2)–O(3b) | 108.33(8)  |
| O(1a)–Cu(1)–O(3a) | 95.06(10)  | O(1b)–Cu(2)–O(3b) | 97.24(8)   |

|            |          |                 |            |
|------------|----------|-----------------|------------|
| Cu(1)–N(1) | 2.032(5) | N(1)–Cu(1)–N(2) | 82.0(2)    |
| Cu(1)–N(2) | 2.023(6) | N(1)–Cu(1)–N(3) | 77.44(19)  |
| Cu(1)–N(3) | 2.340(5) | N(2)–Cu(1)–N(3) | 83.9(2)    |
| Cu(1)–O(1) | 1.925(5) | N(1)–Cu(1)–O(1) | 83.5(2)    |
| Cu(1)–O(3) | 1.931(4) | N(1)–Cu(1)–O(3) | 178.7(2)   |
|            |          | N(2)–Cu(1)–O(1) | 163.3(2)   |
|            |          | N(2)–Cu(1)–O(3) | 99.1(2)    |
|            |          | N(3)–Cu(1)–O(1) | 100.92(19) |
|            |          | N(3)–Cu(1)–O(3) | 103.32(18) |
|            |          | O(1)–Cu(1)–O(3) | 95.3(2)    |

|            |          |                 |            |
|------------|----------|-----------------|------------|
| Cu(1)–N(1) | 2.050(3) | N(1)–Cu(1)–N(2) | 81.18(12)  |
| Cu(1)–N(2) | 2.028(3) | N(1)–Cu(1)–N(3) | 76.94(11)  |
| Cu(1)–N(3) | 2.392(3) | N(2)–Cu(1)–N(3) | 84.03(12)  |
| Cu(1)–O(1) | 1.936(3) | N(1)–Cu(1)–O(1) | 83.79(12)  |
| Cu(1)–O(3) | 1.933(3) | N(1)–Cu(1)–O(3) | 178.81(11) |
|            |          | N(2)–Cu(1)–O(1) | 162.98(12) |
|            |          | N(2)–Cu(1)–O(3) | 99.55(13)  |
|            |          | N(3)–Cu(1)–O(1) | 100.33(12) |
|            |          | N(3)–Cu(1)–O(3) | 104.05(12) |
|            |          | O(1)–Cu(1)–O(3) | 95.35(13)  |

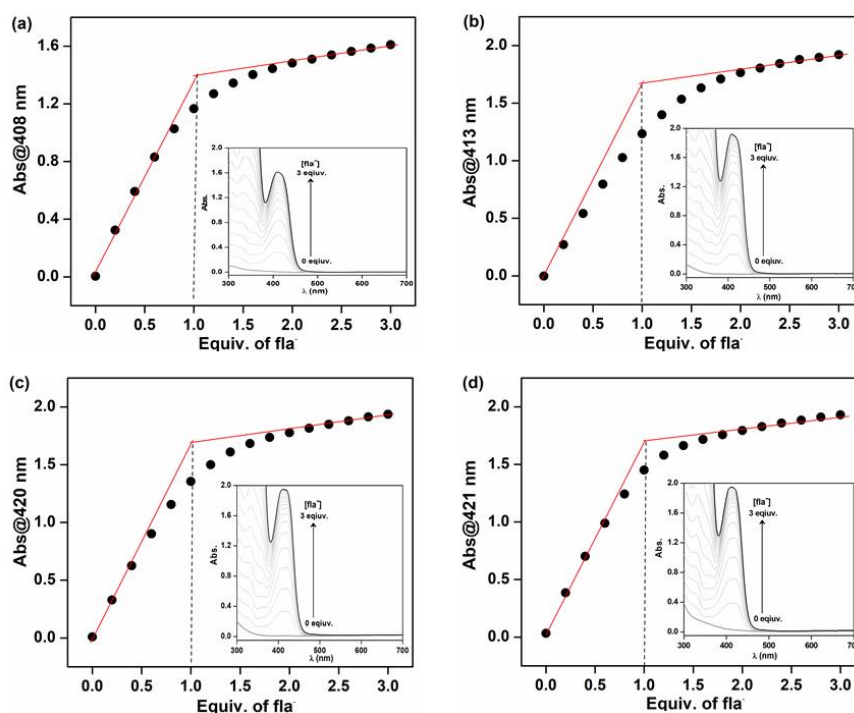

**Figure S17.** Spectrophotometric titration curves for the formation of Cu(II)-flavonolate adducts upon addition of flavonolate into the methanol solution of complex (a)  $[\text{Cu}(\text{L}^{\text{OMe}})(\text{OAc})]$ , (b)  $[\text{Cu}(\text{L}^{\text{H}})(\text{OAc})]$ , (c)  $[\text{Cu}(\text{L}^{\text{Cl}})(\text{OAc})]$ , (d)  $[\text{Cu}(\text{L}^{\text{NO}_2})(\text{OAc})]$  at room temperature under  $\text{N}_2$ . Inset shows the growth of  $\pi \rightarrow \pi^*$  bands due to coordinated flavonolate.

### Determination of equilibrium constant ( $K_{\text{eq}}$ ) from spectrophotometric titration

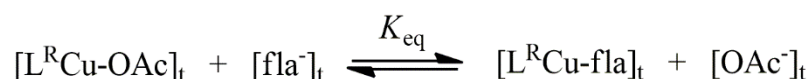

The equilibrium constant can be expressed as:  $K_{\text{eq}} = \frac{[\text{L}^{\text{R}}\text{Cu-fla}]_{\text{t}} * [\text{OAc}^-]_{\text{t}}}{[\text{L}^{\text{R}}\text{Cu-OAc}]_{\text{t}} * [\text{fla}^-]_{\text{t}}}$  ..... (S1)

The concentration of  $[\text{L}^{\text{R}}\text{Cu-fla}]_{\text{t}}$ ,  $[\text{L}^{\text{R}}\text{Cu-OAc}]_{\text{t}}$ ,  $[\text{fla}^-]_{\text{t}}$  and  $[\text{OAc}^-]_{\text{t}}$  species are determined considering the mass balance. A known concentration of  $[\text{L}^{\text{R}}\text{Cu-OAc}]$  was taken in a UV-vis cuvette (pathlength = 1 cm) and its absorption spectrum was recorded. Then, a known concentration of  $\text{fla}^-$  was added portion-wise and the absorbance at 408-421 nm due to  $\pi \rightarrow \pi^*$  band of Cu-bound flavonolate was measured. Each addition of  $\text{fla}^-$  makes the solution diluted; therefore, the volume correction due to dilution was performed for the observed absorbance at each titration.

At the beginning of the titration, when the solution is purely  $[\text{L}^{\text{R}}\text{Cu-OAc}]$  the initial absorbance at any wavelength can be expressed as:

$$A_i = \epsilon_{LRCu-OAc} [L^R Cu-OAc] \dots\dots\dots (S2)$$

Then  $fla^-$  was added gradually to the solution of  $[L^R Cu-OAc]$  to form complex  $[L^R Cu-fla]$ .  $[fla^-]_a$  is the amount of  $fla^-$  added to the solution at any given point of titration. At the end of the titration when all  $[L^R Cu-OAc]$  are converted to  $[L^R Cu-fla]$  by adding excess  $fla^-$ , the final absorbance at any wavelength can be given as:

$$A_f = \epsilon_{LRCu-fla} [L^R Cu-fla] \dots\dots\dots (S3)$$

Following mass balance, at any point of titration the total concentration of  $Cu^{II}$  ion can be expressed as:

$$[L^R Cu-OAc]_i = [L^R Cu-fla]_f = [L^R Cu-OAc]_t + [L^R Cu-fla]_t \dots\dots\dots (S4)$$

Since  $fla^-$  is substituting the bound  $OAc^-$ , we can write:

$$[fla^-]_a = [fla^-]_t + [OAc^-]_t \dots\dots\dots (S5)$$

Assuming the mass balance as described above, the ratio of  $[L^R Cu-fla]_t/[L^R Cu-OAc]_t$  at any point of titration can be expressed as:

$$\begin{aligned} \frac{A_t - A_i}{A_f - A_t} &= \frac{\epsilon_{LRCuOAc}[L^R CuOAc]_t + \epsilon_{LRCufla}[L^R Cufla]_t - \epsilon_{LRCuOAc}[L^R CuOAc]_i}{\epsilon_{LRCufla}[L^R Cufla]_f - \epsilon_{LRCuOAc}[L^R CuOAc]_t - \epsilon_{LRCufla}[L^R Cufla]_t} \\ &= \frac{\epsilon_{LRCuOAc}\{[L^R CuOAc]_t - [L^R CuOAc]_i\} + \epsilon_{LRCufla}[L^R Cufla]_t}{\epsilon_{LRCufla}\{[L^R Cufla]_f - [L^R Cufla]_t\} - \epsilon_{LRCuOAc}[L^R CuOAc]_t} \\ &= \frac{\epsilon_{LRCufla}[L^R Cufla]_t - \epsilon_{LRCuOAc}[L^R Cufla]_t}{\epsilon_{LRCufla}[L^R CuOAc]_t - \epsilon_{LRCuOAc}[L^R CuOAc]_t} \\ &= \frac{[L^R Cufla]_t\{\epsilon_{LRCufla} - \epsilon_{LRCuOAc}\}}{[L^R CuOAc]_t\{\epsilon_{LRCufla} - \epsilon_{LRCuOAc}\}} = \frac{[L^R Cufla]_t}{[L^R CuOAc]_t} \dots\dots\dots (S6) \end{aligned}$$

Therefore,  $[L^R Cufla]_t = \frac{A_t - A_i}{A_f - A_t} [L^R CuOAc]_t$

$$\text{So, } [L^R Cufla]_t = \frac{A_t - A_i}{A_f - A_t} \{[L^R CuOAc]_i - [L^R Cufla]_t\} \dots\dots\dots (S7)$$

Rearranging eq. (S7), the concentration of  $[L^R Cufla]_t$  can be expressed in terms of initial concentration of  $[L^R CuOAc]_i$  as:

$$[L^R Cufla]_t = \frac{\frac{A_t - A_i}{A_f - A_t}}{1 + \frac{A_t - A_i}{A_f - A_t}} [L^R CuOAc]_i \dots\dots\dots (S8)$$

At equilibrium, the concentration of  $[L^R Cufla]_t$  is equal to the concentration of  $[OAc^-]_t$ .

$$[L^R Cufla]_t = [OAc^-]_t \dots\dots\dots(S9)$$



So, from eq. (S5) & (S9):  $[fla^-]_a = [fla^-]_t + [OAc^-]_t = [fla^-]_t + [L^R Cufla]_t$

$$\text{So, } [fla^-]_t = [fla^-]_a - [L^R Cufla]_t = [fla^-]_a - \frac{\frac{A_t - A_i}{A_f - A_t}}{1 + \frac{A_f - A_i}{A_f - A_t}} [L^R CuOAc]_i \dots \dots (S10)$$

The equilibrium constant described in eq. (S1) can be rearranged as:

$$K_{eq} [fla^-]_t = \frac{[L^R Cufla]_t [OAc^-]_t}{[L^R CuOAc]_t}$$

The values of  $[L^R Cufla]_t/[L^R CuOAc]_t$ ,  $[OAc^-]_t$  and  $[fla^-]_t$  can be determined from equations (S6), (S9) and (S10), respectively.

Therefore, the plot of  $[fla^-]_t$  vs  $\frac{[L^R Cufla]_t [OAc^-]_t}{[L^R CuOAc]_t}$  gives a straight line and the slope of the line gives the value of equilibrium constant,  $K_{eq}$ .

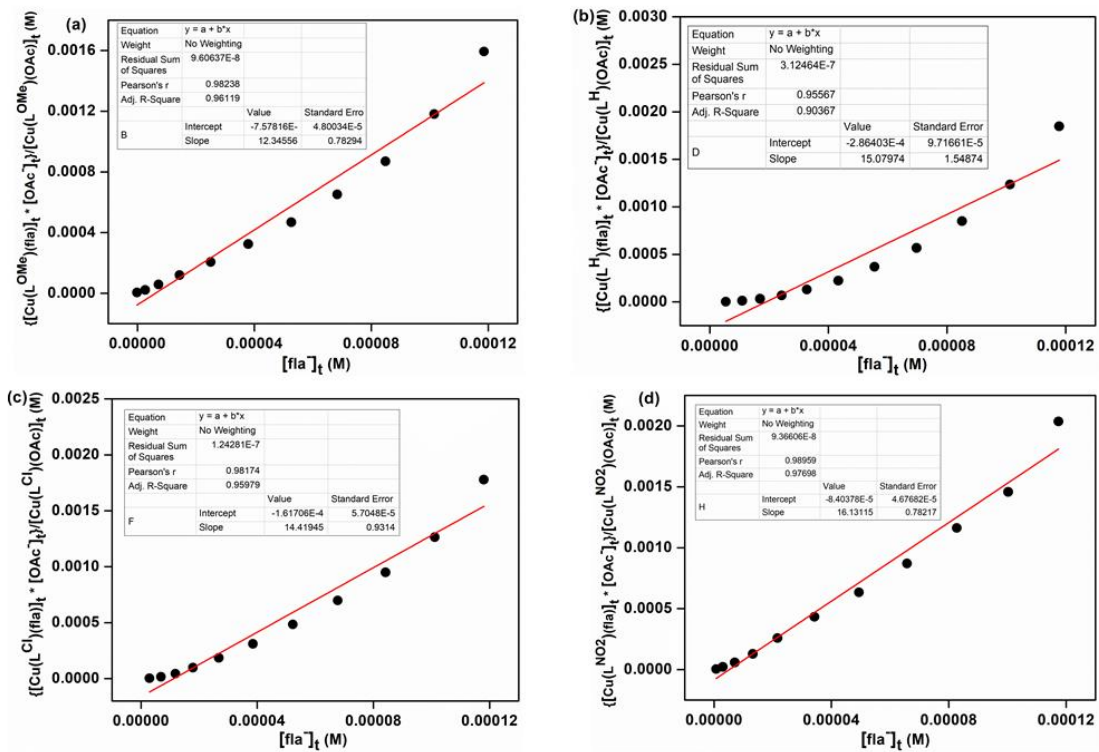

**Figure S18.** Plots of  $\frac{[Cu(L^R)(fla)]_t * [OAc^-]_t}{[Cu(L^R)(OAc)]_t}$  versus  $[fla^-]_t$  to determine the equilibrium constants ( $K_{eq}$ ). The slope of the linear fit represents  $K_{eq}$  value.

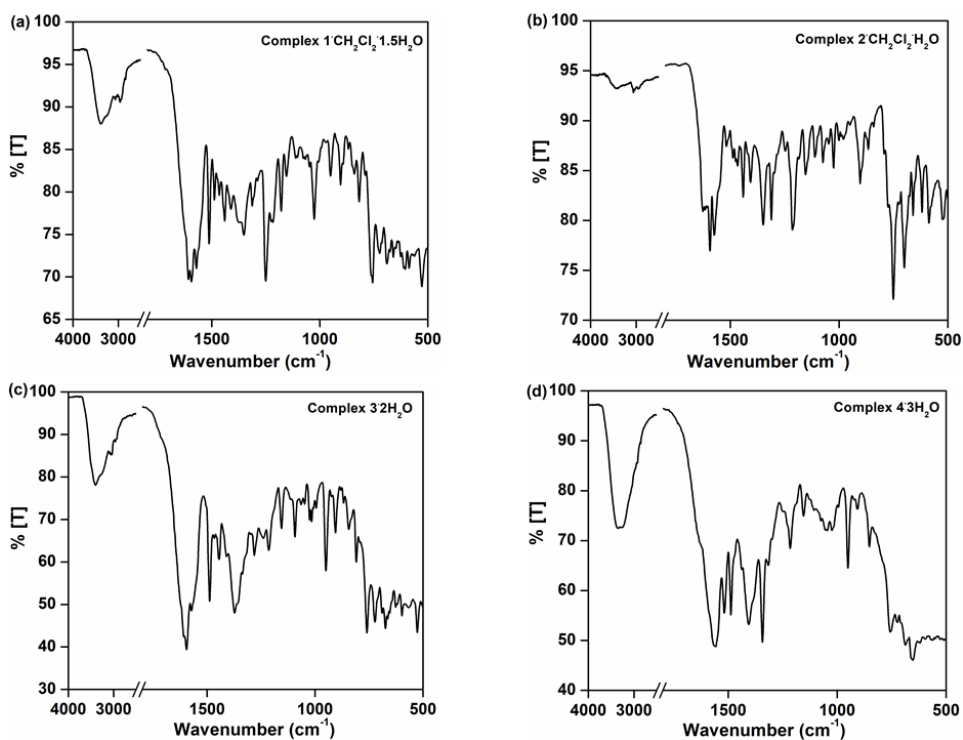

**Figure S19.** ATR-FTIR spectra (solid samples) of copper(II)-flavonolate complexes: (a)  $[\text{Cu}(\text{L}^{\text{OMe}})(\text{fla})]\cdot\text{CH}_2\text{Cl}_2\cdot 1.5\text{H}_2\text{O}$  (**1**· $\text{CH}_2\text{Cl}_2\cdot 1.5\text{H}_2\text{O}$ ); (b)  $[\text{Cu}(\text{L}^{\text{H}})(\text{fla})]\cdot\text{CH}_2\text{Cl}_2\cdot\text{H}_2\text{O}$  (**2**· $\text{CH}_2\text{Cl}_2\cdot\text{H}_2\text{O}$ ); (c)  $[\text{Cu}(\text{L}^{\text{Cl}})(\text{fla})]\cdot 2\text{H}_2\text{O}$  (**3**· $2\text{H}_2\text{O}$ ) and (d)  $[\text{Cu}(\text{L}^{\text{NO}_2})(\text{fla})]\cdot 3\text{H}_2\text{O}$  (**4**· $3\text{H}_2\text{O}$ ).

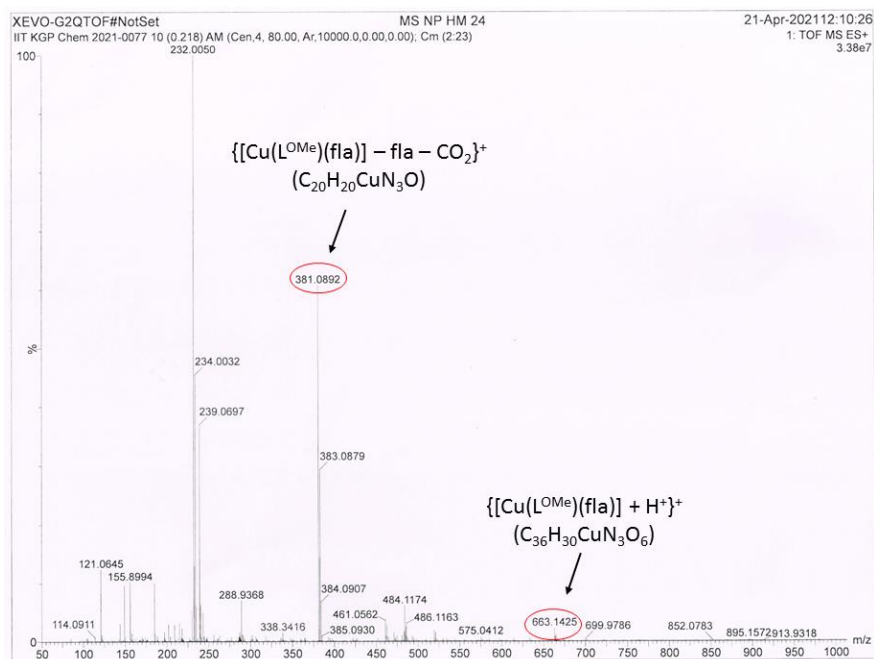

**Figure S20.** HRMS-ESI(+) spectrum of  $[\text{Cu}(\text{L}^{\text{OMe}})(\text{fla})]$  (**1**) in methanol.

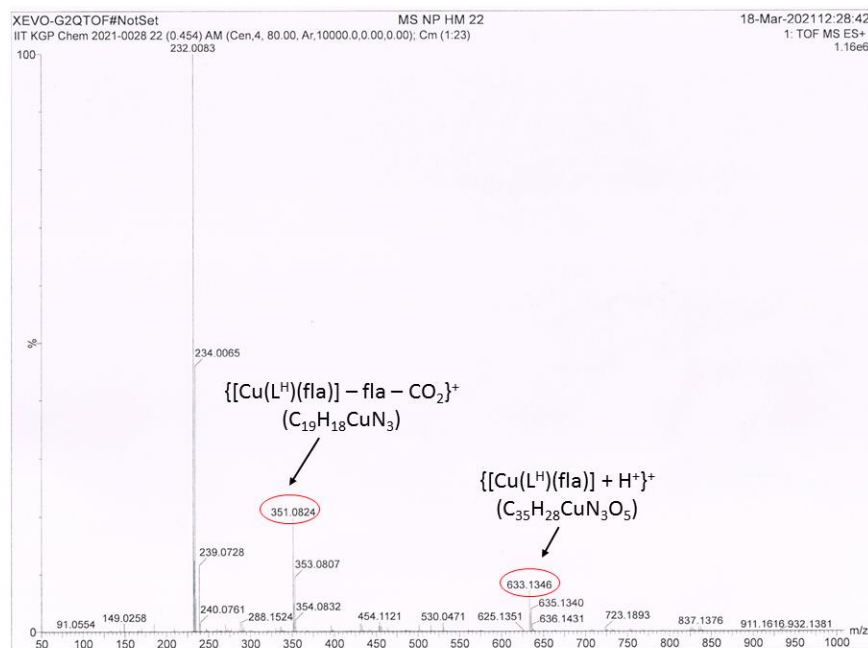

**Figure S21.** HRMS-ESI(+) spectrum of  $[Cu(L^H)(fla)]$  (**2**) in methanol.

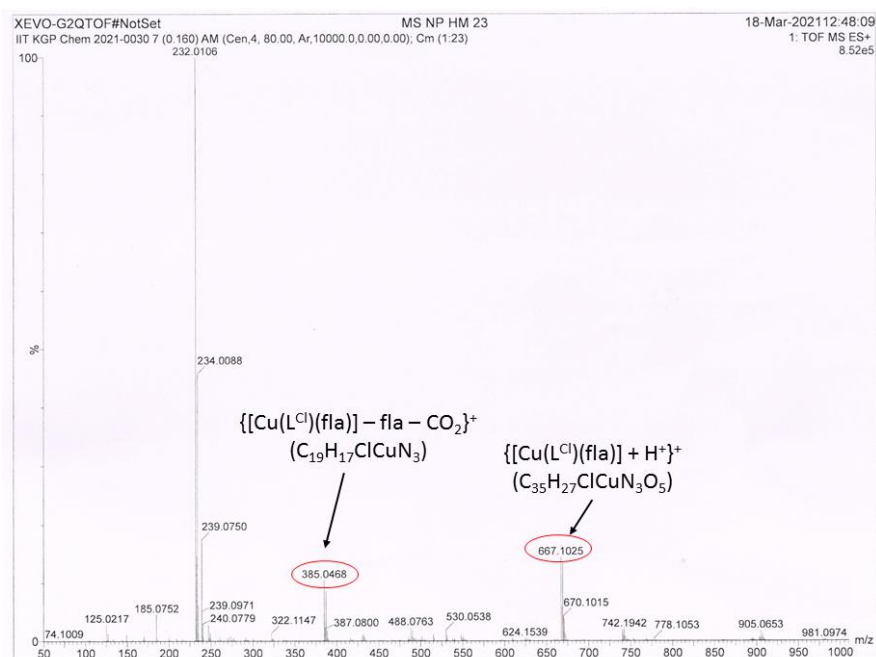

**Figure S22.** HRMS-ESI(+) spectrum of  $[Cu(L^Cl)(fla)]$  (**3**) in methanol.

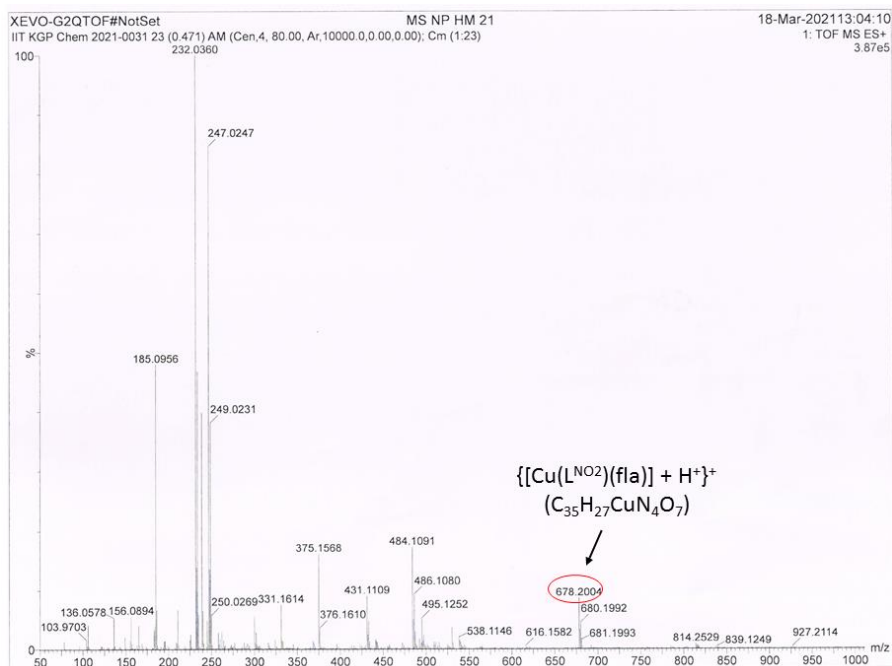

**Figure S23.** HRMS-ESI(+) spectrum of  $[\text{Cu}(\text{L}^{\text{NO}_2})(\text{fla})]$  (**4**) in methanol.

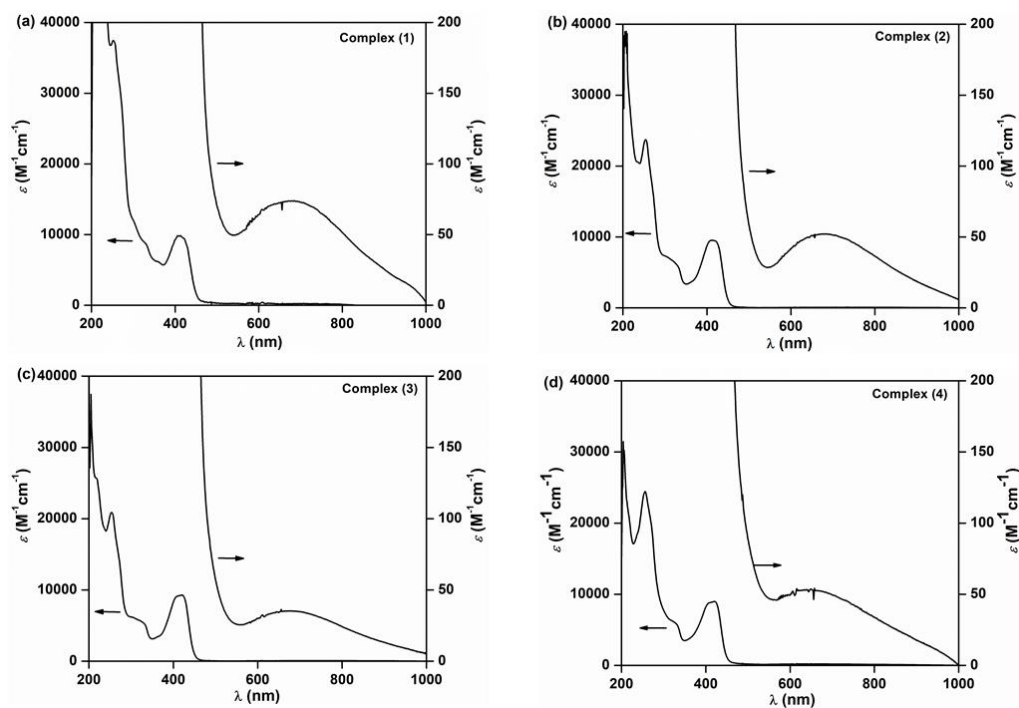

**Figure S24.** UV-vis spectra of copper(II)-flavonolate complexes in methanol: (a)  $[\text{Cu}(\text{L}^{\text{OMe}})(\text{fla})] \cdot \text{CH}_2\text{Cl}_2 \cdot 1.5\text{H}_2\text{O}$  (**1-CH<sub>2</sub>Cl<sub>2</sub>·1.5H<sub>2</sub>O**); (b)  $[\text{Cu}(\text{L}^{\text{H}})(\text{fla})] \cdot \text{CH}_2\text{Cl}_2 \cdot \text{H}_2\text{O}$  (**2-CH<sub>2</sub>Cl<sub>2</sub>·H<sub>2</sub>O**); (c)  $[\text{Cu}(\text{L}^{\text{Cl}})(\text{fla})] \cdot 2\text{H}_2\text{O}$  (**3·2H<sub>2</sub>O**) and (d)  $[\text{Cu}(\text{L}^{\text{NO}_2})(\text{fla})] \cdot 3\text{H}_2\text{O}$  (**4·3H<sub>2</sub>O**).

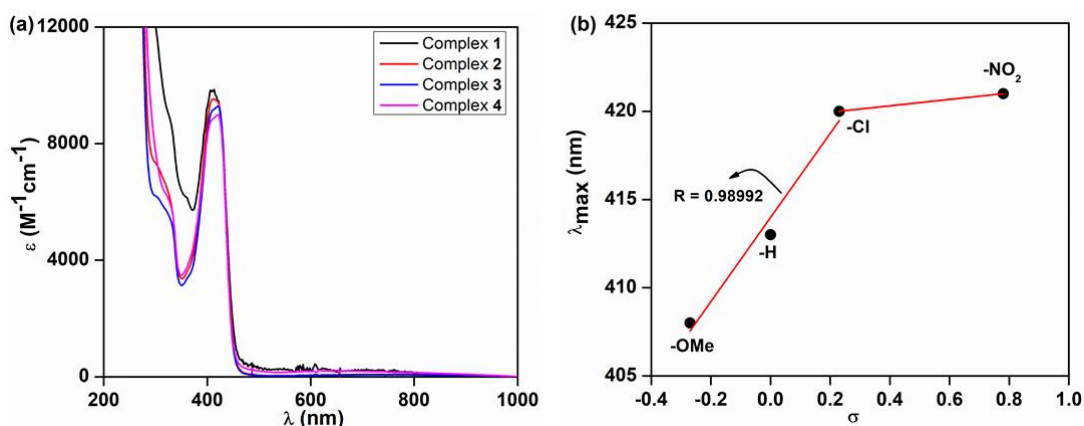

**Figure S25.** (a) Electronic absorption spectra of the complexes [Cu(L<sup>R</sup>)(fla)] (**1-4**) in MeOH. (b) Plot of  $\lambda_{max}$  values of the  $\pi \rightarrow \pi^*$  transition of the coordinated fla<sup>-</sup> in complexes [Cu(L<sup>R</sup>)(fla)] (**1-4**) versus Hammett constants  $\sigma$ .

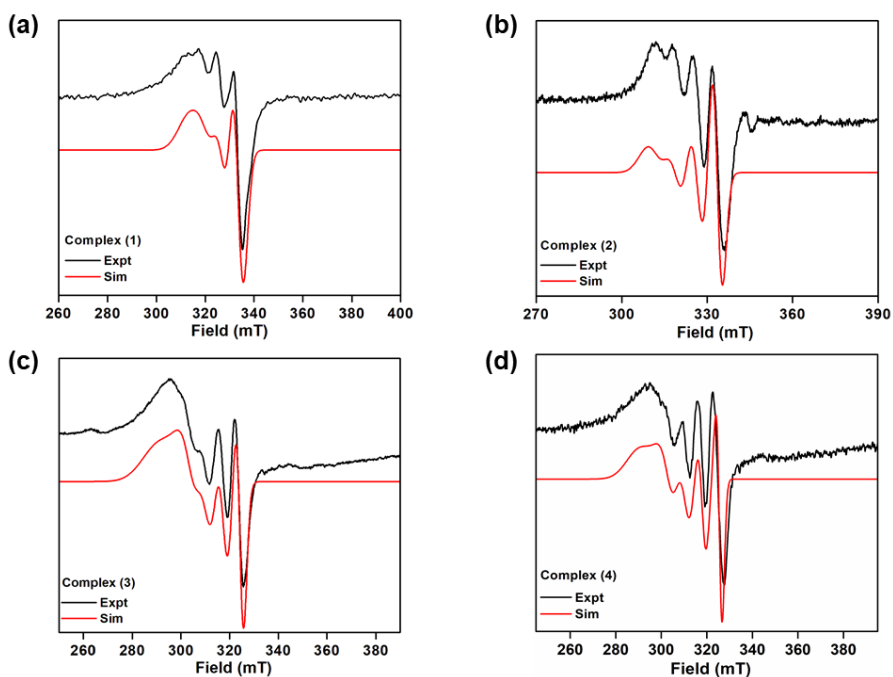

**Figure S26.** Experimental (black line) and simulated (red line) X-band EPR spectra of Cu(II)-flavonolate complexes in methanol at 298 K: (a) [Cu(L<sup>OMe</sup>)(fla)] (**1**); (b) [Cu(L<sup>H</sup>)(fla)] (**2**); (c) [Cu(L<sup>Cl</sup>)(fla)] (**3**); (d) [Cu(L<sup>NO<sub>2</sub></sup>)(fla)] (**4**). Microwave frequency  $\approx$  9.64 GHz (**1**), 9.65 GHz (**2**), 9.36 GHz (**3**), 9.36 GHz (**4**); microwave power = 15 mW; modulation frequency = 5 kHz; modulation amplitude = 3 G.

**Table S7.** Parameters for the simulations of the EPR signals of complexes **1-4** as depicted in Figure S26

| Complex 1                             | Complex 2                          | Complex 3                                     | Complex 4                                      |
|---------------------------------------|------------------------------------|-----------------------------------------------|------------------------------------------------|
| $g_{\text{iso}} = 2.12$               | $g_{\text{iso}} = 2.13$            | $g_{\perp} = 2.125$                           | $g_{\perp} = 2.123$                            |
| $A_{\text{iso}} = 160.40 \text{ MHz}$ | $A_{\text{iso}} = 200 \text{ MHz}$ | $g_{\parallel} = 2.30$                        | $g_{\parallel} = 2.30$                         |
| $g\text{-strain} = 0.055$             | $g\text{-strain} = 0.045$          | $A_{\perp} = 192.43 \text{ MHz}$              | $A_{\perp} = 211.94 \text{ MHz}$               |
| $A\text{-strain} = 58.40 \text{ MHz}$ | $A\text{-strain} = 50 \text{ MHz}$ | $A_{\parallel} = 23.43 \text{ MHz}$           | $A_{\parallel} = 40 \text{ MHz}$               |
|                                       |                                    | $g_{\perp}\text{-strain} = 0.040$             | $g_{\perp}\text{-strain} = 0.035$              |
|                                       |                                    | $g_{\parallel}\text{-strain} = 0.125$         | $g_{\parallel}\text{-strain} = 0.099$          |
|                                       |                                    | $A_{\perp}\text{-strain} = 48.30 \text{ MHz}$ | $A_{\perp}\text{-strain} = 50 \text{ MHz}$     |
|                                       |                                    | $A_{\parallel}\text{-strain} = 5 \text{ MHz}$ | $A_{\parallel}\text{-strain} = 10 \text{ MHz}$ |

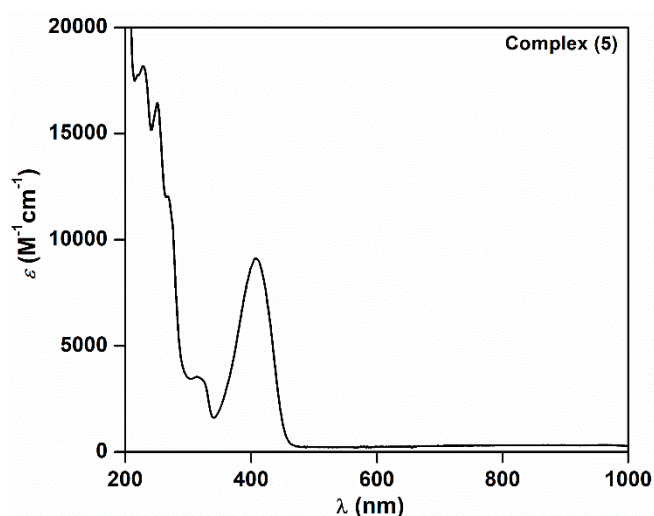

**Figure S27.** UV-vis spectrum of  $[\text{Zn}(\text{L}^{\text{OMe}})(\text{fla})]\cdot 2\text{H}_2\text{O}$  (**5** $\cdot 2\text{H}_2\text{O}$ ) in methanol.

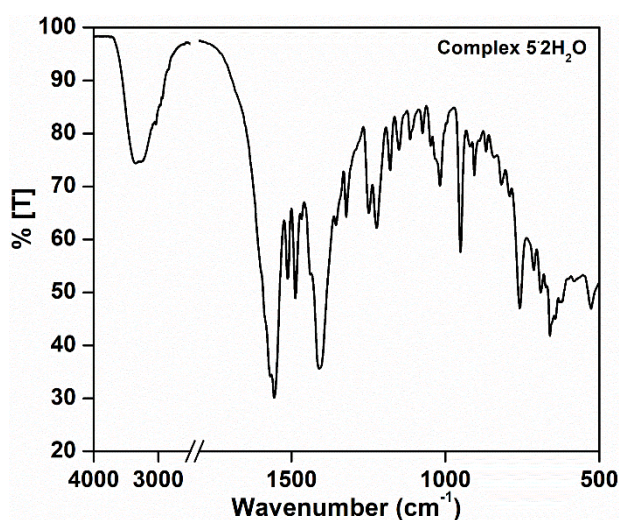

**Figure S28.** ATR-FTIR spectrum (solid sample) of  $[\text{Zn}(\text{L}^{\text{OMe}})(\text{fla})]\cdot 2\text{H}_2\text{O}$  (**5** $\cdot 2\text{H}_2\text{O}$ ).

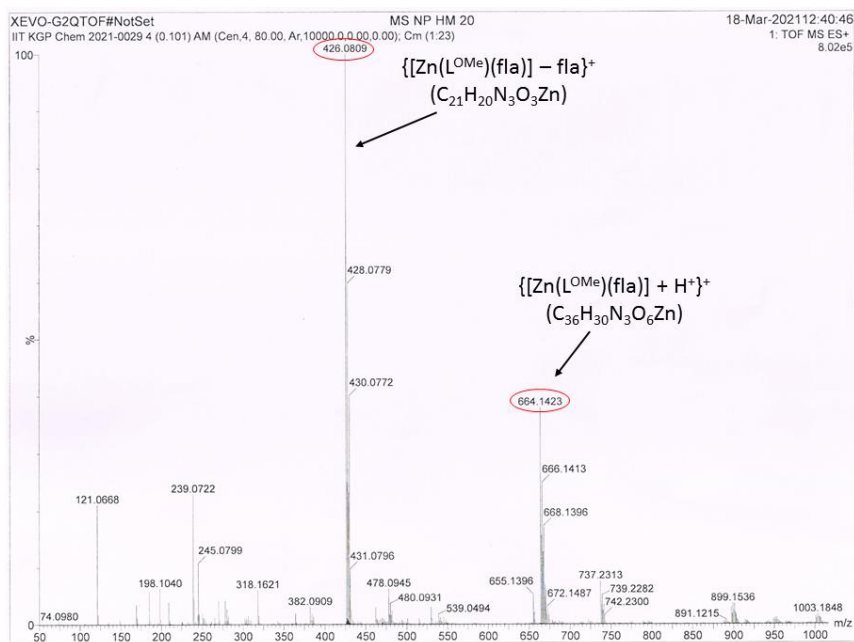

**Figure S29.** HRMS-ESI(+) spectrum of  $[\text{Zn}(\text{L}^{\text{OMe}})(\text{fla})]$  (**5**) in methanol.

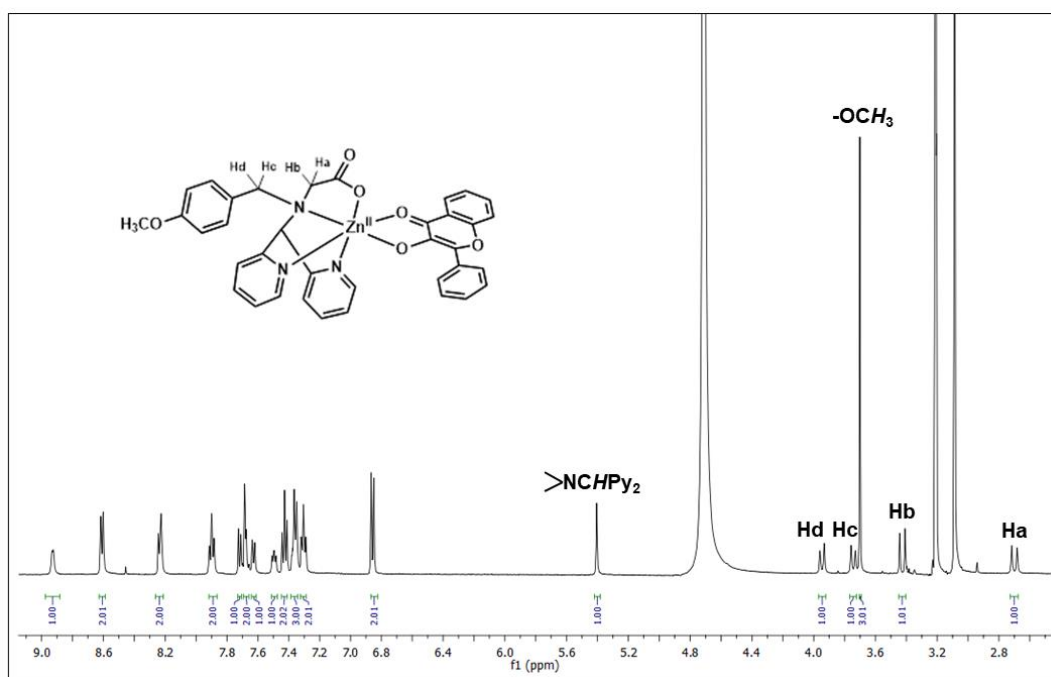

**Figure S30.**  $^1\text{H}$  NMR spectrum (500 MHz, 300 K) of complex  $[\text{Zn}(\text{L}^{\text{OMe}})(\text{fla})]$  (**5**) in  $\text{CD}_3\text{OD}$ .

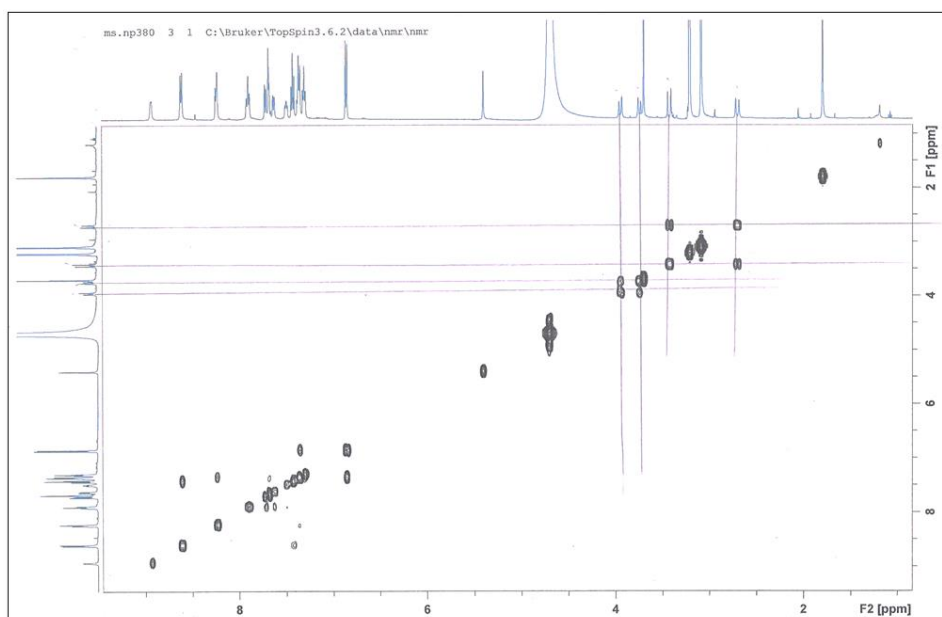

**Figure S31.** 2D  $^1\text{H}$   $^1\text{H}$  COSY (500 MHz, 300 K) of complex  $[\text{Zn}(\text{L}^{\text{OMe}})(\text{fla})]$  (**5**) in  $\text{CD}_3\text{OD}$ .

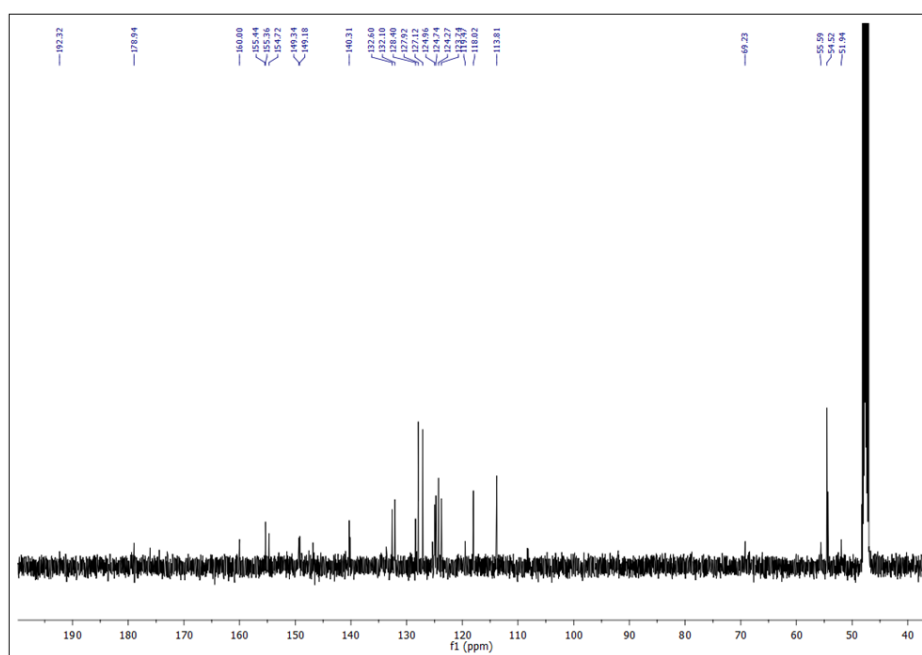

**Figure S32.**  $^{13}\text{C}$  NMR spectrum (125 MHz, 300 K) of complex  $[\text{Zn}(\text{L}^{\text{OMe}})(\text{fla})]$  (**5**) in  $\text{CD}_3\text{OD}$ .



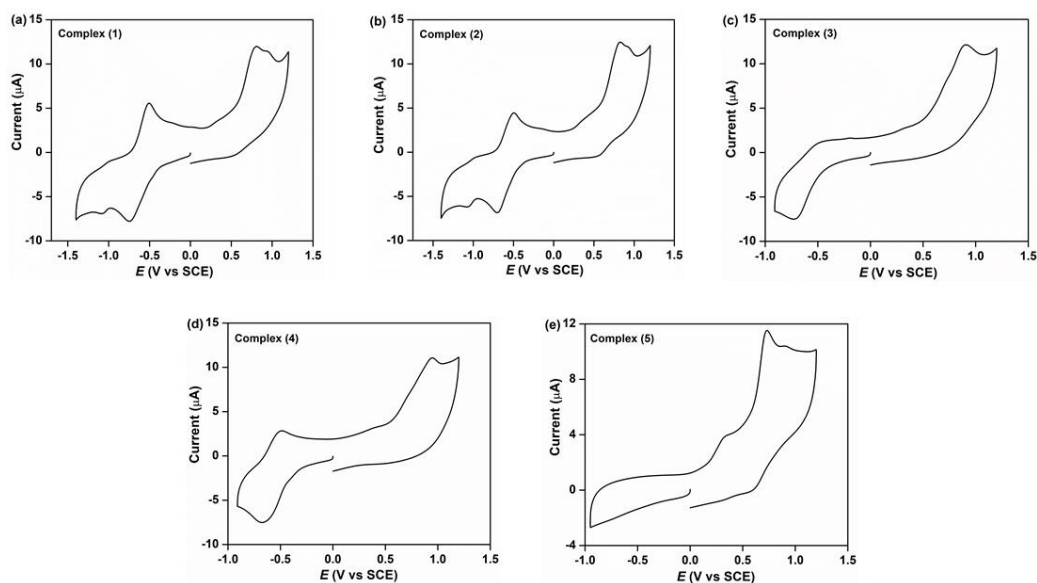

**Figure S33.** Cyclic voltammograms of the metal-flavonolate complexes **1-5** in DMF (scan rate: 100 mV/s; supporting electrolyte: KPF<sub>6</sub>).

**Table S8.** Percentage of product distribution obtained from GC-MS analysis

|                                                      | <i>o</i> -benzoyl<br>-salicylic acid<br>(RT: 21.73) | salicylic acid<br>(RT: 13.29) | benzoic acid<br>(RT: 17.37-<br>17.43) | 2-hydroxy- <i>N,N</i> -<br>dimethyl<br>-benzamide<br>(RT: 15.30) | <i>N,N</i> -dimethyl<br>-benzamide<br>(RT: 11.25) |
|------------------------------------------------------|-----------------------------------------------------|-------------------------------|---------------------------------------|------------------------------------------------------------------|---------------------------------------------------|
| [Cu(L <sup>OMe</sup> )(fla)] ( <b>1</b> )            | 22                                                  | -                             | 67                                    | -                                                                | 11                                                |
| [Cu(L <sup>H</sup> )(fla)] ( <b>2</b> )              | 13                                                  | 19                            | 11                                    | 54                                                               | 3                                                 |
| [Cu(L <sup>Cl</sup> )(fla)] ( <b>3</b> )             | 72                                                  | -                             | 27                                    | -                                                                | 1                                                 |
| [Cu(L <sup>NO<sub>2</sub></sup> )(fla)] ( <b>4</b> ) | 10                                                  | -                             | 29                                    | 59                                                               | 2                                                 |
| [Zn(L <sup>OMe</sup> )(fla)] ( <b>5</b> )            | 42                                                  | -                             | -                                     | 57                                                               | 1                                                 |

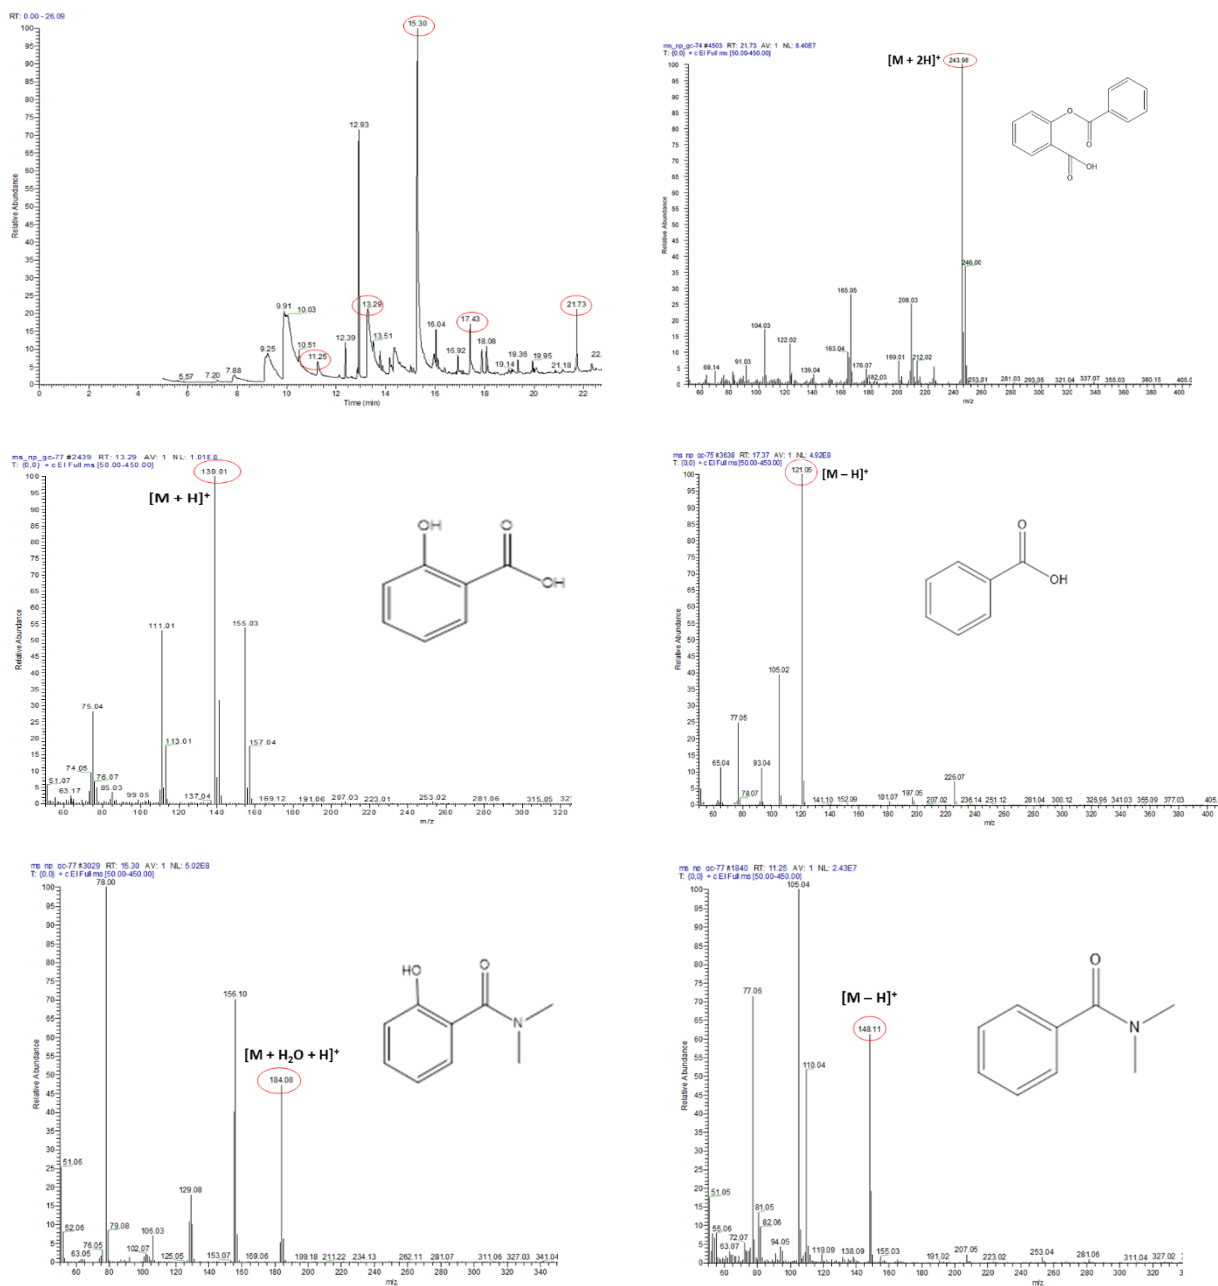

**Figure S34.** Reaction product analysis by GC-MS. (Top left) Representative GC-MS chromatogram for complex **2**. The illustrative mass spectra of products from few selected reaction solutions: (top right) *o*-benzoylsalicylic acid (from **3**), (middle left) salicylic acid (from **2**), (middle right) benzoic acid (from **4**), (bottom left) 2-hydroxy-*N,N*-dimethylbenzamide (from **2**) and (bottom right) *N,N*-dimethylbenzamide (from **2**).

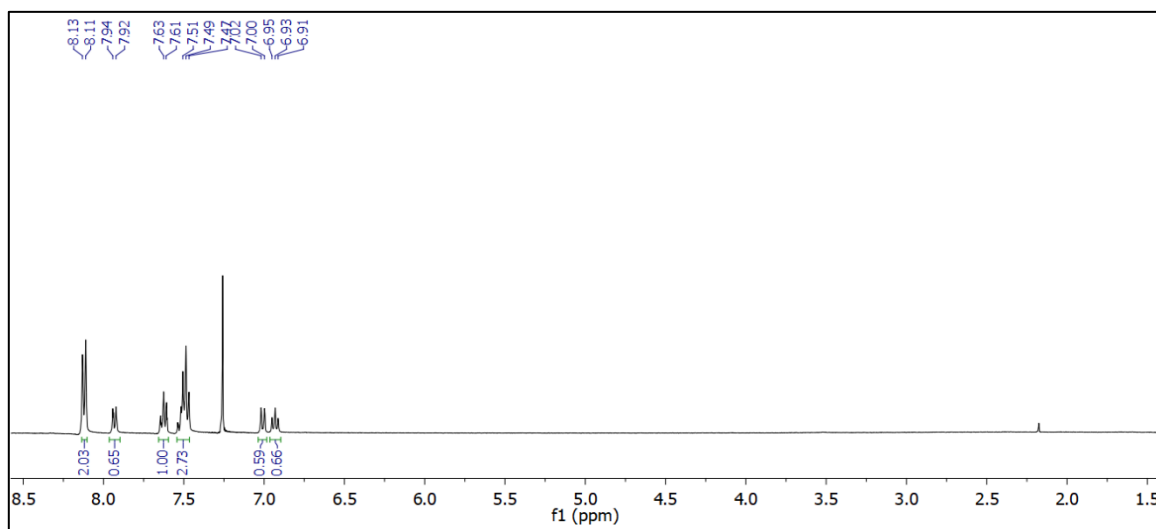

**Figure S35.**  $^1\text{H}$  NMR spectrum (in  $\text{CDCl}_3$ ) of the degraded products obtained from  $[\text{L}^{\text{H}}\text{Cu}(\text{fla})]$  (**2**). Signals correspond to mixture of benzoic acid [ $\delta(\text{ppm}) = 8.12$  (d, 2H), 7.62 (t, 1H), 7.48 (t, 2H)] and salicylic acid [ $\delta(\text{ppm}) = 7.93$  (d, 1H), 7.51 (t, 1H), 7.01 (d, 1H), 6.93 (t, 1H)] in 60:40 ratio.

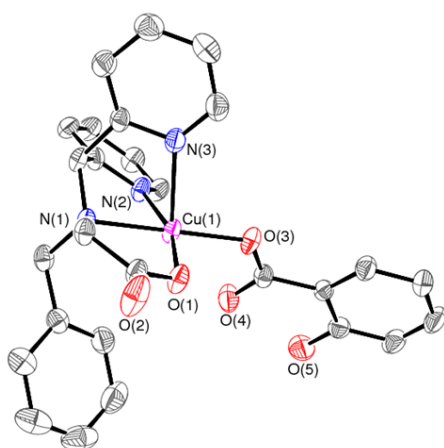

**Selected bond lengths (Å) and bond angles (°)**

|            |          |                 |            |
|------------|----------|-----------------|------------|
| Cu(1)–N(1) | 2.085(3) | O(3)–Cu(1)–O(1) | 92.92(13)  |
| Cu(1)–N(2) | 2.070(4) | O(3)–Cu(1)–N(2) | 102.90(13) |
| Cu(1)–N(3) | 2.296(4) | O(1)–Cu(1)–N(2) | 163.17(13) |
| Cu(1)–O(1) | 1.977(3) | O(3)–Cu(1)–N(1) | 176.32(13) |
| Cu(1)–O(3) | 1.952(3) | O(1)–Cu(1)–N(1) | 83.92(12)  |
|            |          | N(2)–Cu(1)–N(1) | 80.45(13)  |
|            |          | O(3)–Cu(1)–N(3) | 99.78(13)  |
|            |          | O(1)–Cu(1)–N(3) | 98.37(14)  |
|            |          | N(2)–Cu(1)–N(3) | 84.72(15)  |
|            |          | N(1)–Cu(1)–N(3) | 78.88(14)  |

**Figure S36.** ORTEP (30% ellipsoid) diagram of the salicylate bound copper(II) complex,  $[\text{Cu}(\text{L}^{\text{H}})(\text{sal})]$ . Hydrogen atoms are omitted for clarity. Carbon atoms are not labelled. {Crystal data: CCDC = 2112727,  $\lambda$  (Å):  $\text{Mo-K}\alpha$  (0.71073), Monoclinic,  $P2_1/n$  (# 14),  $a = 18.135(4)$  Å,  $b = 9.278(2)$  Å,  $c = 15.307(3)$  Å,  $\alpha = \gamma = 90^\circ$ ,  $\beta = 103.47(3)^\circ$ ,  $V = 2504.6(10)$  Å<sup>3</sup>,  $Z = 4$ ,  $D_c = 1.411$  g cm<sup>-3</sup>, Reflections measured = 15536, Unique reflections [ $R_{\text{int}}$ ] = 5303 [0.1383], Number of reflections used [ $I > 2\sigma(I)$ ] = 2890, Final  $R$  indices:  $R_1 = 0.0577$ ,  $wR_2 = 0.1402$ ,  $R$  indices (all data):  $R_1 = 0.1173$ ,  $wR_2 = 0.1825$ , Goodness-of-fit on  $F^2 = 0.960$ ,  $T = 296(2)$  K}.

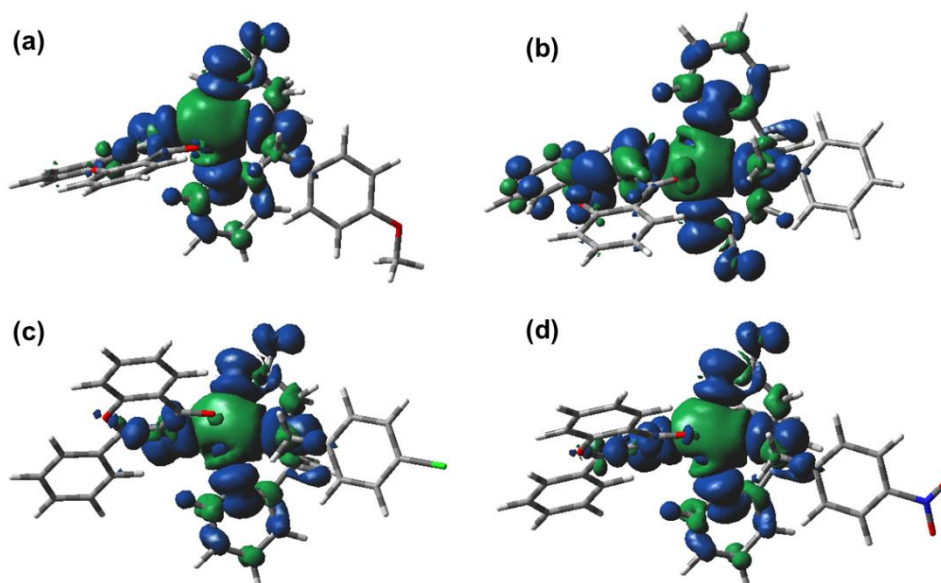

**Figure S37.** Mulliken atomic spin density plots of (a) [Cu(L<sup>OMe</sup>)(fla)] (**1**), (b) [Cu(L<sup>H</sup>)(fla)] (**2**), (c) [Cu(L<sup>Cl</sup>)(fla)] (**3**), and (d) [Cu(L<sup>NO<sub>2</sub></sup>)(fla)] (**4**) in doublet ground state.

**Table S9.** Mulliken atomic spin density values of complexes **1-4**.

| Complex                                              | Spin State | Spin Density |       |                |
|------------------------------------------------------|------------|--------------|-------|----------------|
|                                                      |            | Cu           | fla   | L <sup>R</sup> |
| [Cu(L <sup>OMe</sup> )(fla)] ( <b>1</b> )            | doublet    | 0.698        | 0.089 | 0.276          |
| [Cu(L <sup>H</sup> )(fla)] ( <b>2</b> )              | doublet    | 0.660        | 0.104 | 0.236          |
| [Cu(L <sup>Cl</sup> )(fla)] ( <b>3</b> )             | doublet    | 0.689        | 0.079 | 0.278          |
| [Cu(L <sup>NO<sub>2</sub></sup> )(fla)] ( <b>4</b> ) | doublet    | 0.697        | 0.088 | 0.267          |

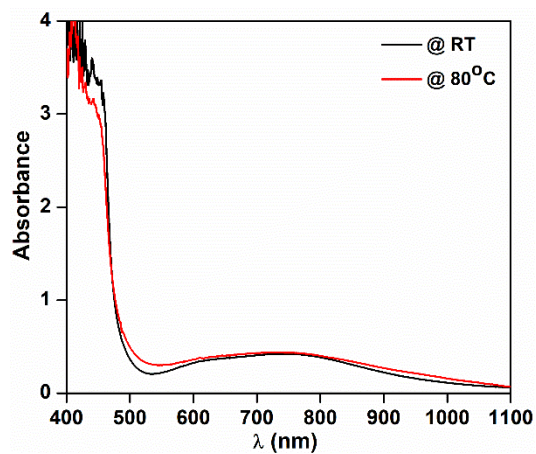

**Figure S38.** Electronic spectra of complex  $[\text{Cu}(\text{L}^{\text{H}})(\text{fla})]$  (**2**) (~6.5 mM) in DMF at: (black line) room temperature, and (red line) 80 °C under  $\text{N}_2$  atmosphere. The visible region bands correspond to the  $d-d$  transitions.

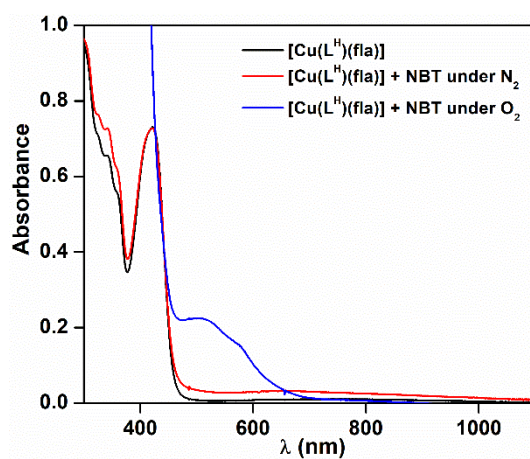

**Figure S39.** Spectral changes of reaction of  $[\text{Cu}(\text{L}^{\text{H}})(\text{fla})]$  (**2**) with NBT under  $\text{O}_2$  in DMF.

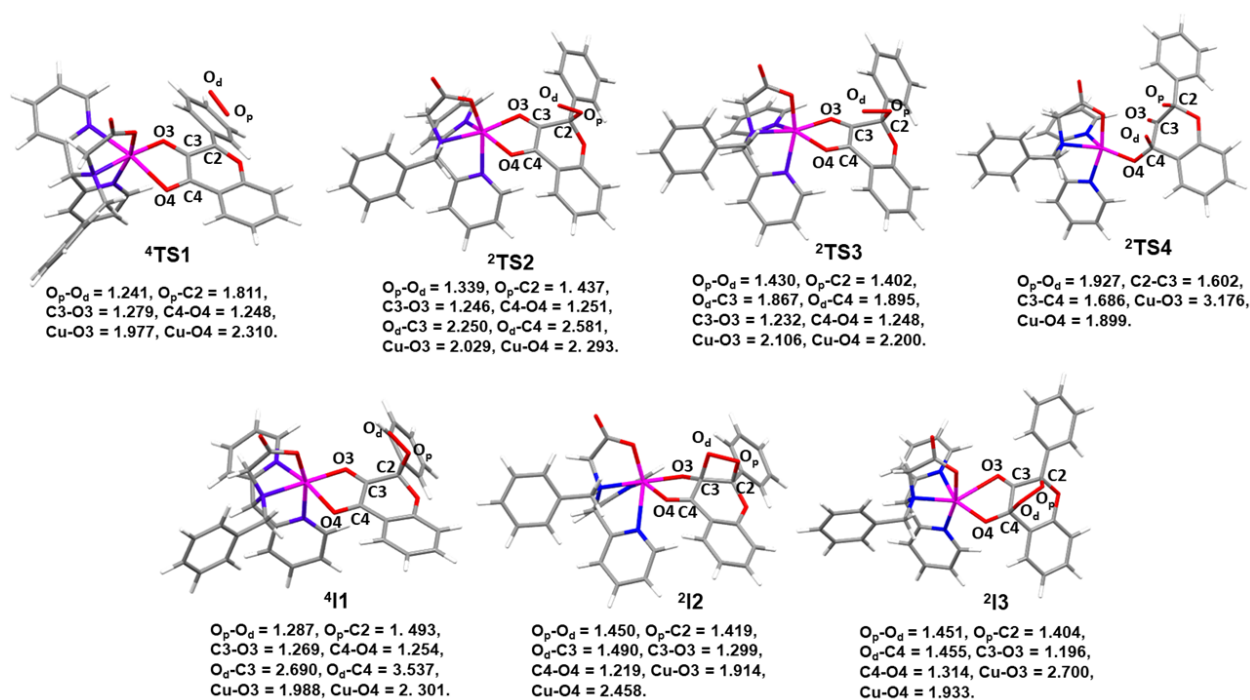

**Figure S40.** Optimized structures of various transition states (TSs) and intermediates (Is) of oxygenolysis reaction starting with complex  $[Cu(L^H)(fla)]$  (**2**). The bond lengths are shown in Å. Color code: Cu, magenta; C, gray; N, blue; O, red; H, white.

**Table S10.** Mulliken atomic spin density values of various states during oxygenolysis reaction with complex  $[Cu(L^H)(fla)]$  (**2**)

| State       | Cu    | fla    | $O_p$  | $O_d$  | $L^H$ |
|-------------|-------|--------|--------|--------|-------|
| <b>4R</b>   | 0.670 | 0.101  | 1.022  | 0.976  | 0.231 |
| <b>4TS1</b> | 0.686 | 0.690  | 0.611  | 0.760  | 0.253 |
| <b>4I1</b>  | 0.677 | 1.045  | 0.310  | 0.708  | 0.260 |
| <b>2TS2</b> | 0.683 | -0.692 | 0.144  | 0.601  | 0.264 |
| <b>2I2</b>  | 0.683 | 0.093  | 0      | 0      | 0.224 |
| <b>2TS3</b> | 0.678 | 0.053  | 0      | -0.002 | 0.271 |
| <b>2I3</b>  | 0.662 | 0.105  | -0.001 | 0      | 0.234 |
| <b>2TS4</b> | 0.650 | 0.053  | 0.056  | 0.004  | 0.237 |
| <b>2P</b>   | 0.669 | 0.083  | 0      | -0.001 | 0.249 |

**Table S11. Optimized coordinates of reactants <sup>4</sup>R**

|    |                   |                   |                   |
|----|-------------------|-------------------|-------------------|
| Cu | -0.07252882939979 | -0.32060697486603 | -0.16859498155090 |
| O  | 1.73831796591438  | -0.68727535080118 | 0.39368386280761  |
| O  | 0.66109070391988  | 1.74679847015307  | 0.76990425594567  |
| N  | -2.09121734123350 | 0.02497565961324  | -0.58890274239032 |
| O  | 0.19032853623221  | 0.43338066617237  | -1.93605994043421 |
| N  | -0.92724357629547 | -0.82860284935306 | 1.66253770869354  |
| O  | 4.65456871770223  | 1.43053709378649  | 0.20660648027829  |
| C  | 1.88024777310193  | 1.67087740397754  | 0.58697271985497  |
| C  | 2.52020761925328  | 0.35623361084048  | 0.37488268950420  |
| C  | -0.30919282465011 | -0.85131824740632 | 2.83739486770211  |
| H  | 0.76704429183966  | -0.65853153395306 | 2.80227778200688  |
| C  | 2.75770989679278  | 2.83460642435582  | 0.57073177588948  |
| O  | -0.93852424182513 | 1.18171622165171  | -3.72266689870582 |
| C  | -0.86324386447026 | 0.61538433699662  | -2.65142829435322 |
| C  | 4.12991620382537  | 2.64770748871546  | 0.37437180590546  |
| C  | -2.37741983317810 | 1.38576741628141  | -0.06766611448248 |
| H  | -1.65865381059695 | 2.05937926399467  | -0.55588208327102 |
| H  | -2.12257442158456 | 1.40742155065181  | 1.00087579839662  |
| C  | 3.88605568693485  | 0.29914323457165  | 0.19477027106730  |
| C  | -2.24057949543765 | -1.05665157919009 | 1.57050149602970  |
| C  | 2.26097988202465  | 4.14135558720171  | 0.74554321104343  |
| H  | 1.18477826568139  | 4.25628159875901  | 0.89120045278313  |
| C  | -2.75888666276079 | -1.06445879073820 | 0.13671625071403  |
| H  | -3.85901666751409 | -0.97527175052304 | 0.12292934631159  |
| C  | 6.27383602456526  | -3.20356766814234 | -0.46200978660923 |
| H  | 6.88621426733059  | -4.09216321347597 | -0.63592209793772 |
| C  | -2.37626433530883 | -1.35020336701455 | 3.93798953191743  |
| H  | -2.95309040992119 | -1.55301995272010 | 4.84368563432447  |
| C  | 4.69278015762509  | -0.91415862074596 | -0.02087841378505 |
| C  | -3.01132021245786 | -1.32584957337183 | 2.69503493029319  |
| H  | -4.08363640868331 | -1.50988654161895 | 2.59982704828961  |
| C  | 5.00761744971566  | 3.74571814849048  | 0.35281552679058  |
| H  | 6.07267671750663  | 3.56559377442077  | 0.19638115481219  |
| C  | -3.79427917994956 | 1.86371056440503  | -0.28327514141942 |
| C  | 4.49692473366933  | 5.01723321800542  | 0.52634820091365  |
| H  | 5.17524289726260  | 5.87407667621886  | 0.50717240877515  |
| C  | -1.00653173381707 | -1.11279035652669 | 4.01514549163019  |
| H  | -0.48178277051184 | -1.12545306979602 | 4.97172674545922  |
| C  | 3.11665965501232  | 5.22329806819919  | 0.72394240054302  |
| H  | 2.73048746817489  | 6.23647238799704  | 0.85469114179268  |
| C  | 6.05389502513174  | -0.79922111910349 | -0.35398648498458 |
| H  | 6.49903487265829  | 0.19190626618675  | -0.44640687517214 |
| C  | 4.13929764455155  | -2.20214087698968 | 0.09285462849860  |
| H  | 3.08455540943244  | -2.29187547942124 | 0.34880024416584  |
| C  | 4.92689628605073  | -3.32909823227772 | -0.12716545165855 |
| H  | 4.47799757603017  | -4.32190154931346 | -0.03456235452889 |
| C  | -4.14267471874863 | 2.55700202200107  | -1.44945538028453 |
| H  | -3.37225412236372 | 2.77224318582899  | -2.19671418967207 |
| C  | 6.83262218743502  | -1.93064662872786 | -0.57279427143468 |
| H  | 7.88741767212336  | -1.81583926470500 | -0.83594575486664 |
| C  | -4.78534917520604 | 1.62046487808554  | 0.67506331396902  |
| H  | -4.51784212243415 | 1.11581617546125  | 1.60933424557826  |
| C  | -5.45562479438650 | 2.97323873714943  | -1.66166740837883 |
| H  | -5.71124901697258 | 3.51236271974090  | -2.57709116292634 |
| C  | -6.09963700221226 | 2.03553555301709  | 0.46549206821045  |
| H  | -6.86085877238366 | 1.84253502029098  | 1.22577084251368  |
| C  | -6.43764288830645 | 2.70908062314445  | -0.70736457358154 |

|   |                   |                   |                   |
|---|-------------------|-------------------|-------------------|
| H | -7.46632185072040 | 3.03878659307493  | -0.87317436524359 |
| C | -2.14760186698903 | -0.01492115513562 | -2.05714375387555 |
| H | -3.04216185427526 | 0.48107447391304  | -2.45857722880525 |
| H | -2.17253205091250 | -1.05751754990073 | -2.39936844699340 |
| N | -1.03828709545688 | -2.54229108279200 | -0.68554255021456 |
| C | -2.34551049492811 | -2.40899166881767 | -0.45753593718640 |
| C | -2.76622977438012 | -4.63734182128968 | -1.21396541468201 |
| H | -3.45041602450751 | -5.46240637922009 | -1.42673097987617 |
| C | -1.40262716541938 | -4.76923997811834 | -1.45476427164597 |
| H | -0.98442566065283 | -5.69280223472289 | -1.85901880195848 |
| C | -3.25425294631161 | -3.43266793121282 | -0.70582446129666 |
| H | -4.32018309739420 | -3.28711729692179 | -0.51743283471344 |
| C | -0.57073233190471 | -3.68339423486920 | -1.17567998143102 |
| H | 0.50770608813524  | -3.72412228047285 | -1.35645639183609 |
| O | 2.02325918102021  | -1.88011004244141 | -2.52118189997566 |
| O | 2.75403758980886  | -0.95425886665732 | -2.66513561124882 |

**Table S12. Optimized coordinates of transition state <sup>4</sup>TS1**

|    |                   |                   |                   |
|----|-------------------|-------------------|-------------------|
| Cu | -0.20703090352162 | -0.30543919253931 | -0.95235422961038 |
| O  | 1.71984897095107  | -0.64936731074498 | -0.67115959153757 |
| O  | 0.53052020262202  | 1.76207159135654  | -0.23299006336775 |
| N  | -2.27524698623945 | -0.00339591398007 | -0.91395375569284 |
| O  | -0.36504704260871 | 0.16669527090536  | -2.81890337086495 |
| N  | -0.64707922850642 | -0.82273324973934 | 1.05976858672576  |
| O  | 4.56017207162037  | 1.37889297476163  | 0.15675952493701  |
| C  | 1.77445499267754  | 1.66558617273973  | -0.20976891383564 |
| C  | 2.41823328870370  | 0.38187504986080  | -0.38029379553672 |
| C  | 0.16683931308644  | -0.83517300776102 | 2.11046060412627  |
| H  | 1.21553382748325  | -0.60096358882447 | 1.90498224929694  |
| C  | 2.64863030818488  | 2.82331115048044  | -0.02732512934915 |
| O  | -1.85619041359810 | 0.41657563427364  | -4.47214557957362 |
| C  | -1.55029910134813 | 0.22316667211447  | -3.31428422080076 |
| C  | 4.02511860757838  | 2.62401659458757  | 0.10457286314418  |
| C  | -2.40057892327912 | 1.34916497181271  | -0.31881328371692 |
| H  | -1.88375320426361 | 2.02325670558568  | -1.01574631963210 |
| H  | -1.80422600593408 | 1.39075619884505  | 0.60255190542499  |
| C  | 3.87163779097929  | 0.28011813578136  | -0.25759465953669 |
| C  | -1.94354103001606 | -1.11262467281486 | 1.21063121847954  |
| C  | 2.14119486072329  | 4.13068536807337  | -0.00034883251002 |
| H  | 1.06110751868384  | 4.25579964272048  | -0.09843620425353 |
| C  | -2.71742482410097 | -1.13785814287114 | -0.09475973221625 |
| H  | -3.80437889337433 | -1.13089274128208 | 0.09717475696705  |
| C  | 5.64849847642031  | -3.32988481871828 | 1.24508288399411  |
| H  | 6.10540171773245  | -4.24300750504754 | 1.63712462731659  |
| C  | -1.64657423534571 | -1.43332513463552 | 3.55930336155963  |
| H  | -2.04716030338199 | -1.67963711932118 | 4.54579901318664  |
| C  | 4.48177242893571  | -0.97742066701349 | 0.25811927185485  |
| C  | -2.48732070845320 | -1.43519025683896 | 2.44740142909999  |
| H  | -3.54692632268638 | -1.68518167892415 | 2.53297487045931  |
| C  | 4.89797221223273  | 3.70616969220970  | 0.22849349432727  |
| H  | 5.96809903740348  | 3.50991054523986  | 0.31660027044502  |
| C  | -3.79735014543308 | 1.84418723800441  | -0.03673392052089 |
| C  | 4.37856207878005  | 4.99348516937649  | 0.23111314477614  |
| H  | 5.05744220981215  | 5.84437887534819  | 0.31947622135888  |



|   |                   |                   |                   |
|---|-------------------|-------------------|-------------------|
| C | -0.29820163517687 | -1.13168017445686 | 3.39099959215981  |
| H | 0.39021985917444  | -1.12614694807107 | 4.23647124112618  |
| C | 2.99724925457813  | 5.21156032506092  | 0.12343414848690  |
| H | 2.59691723238474  | 6.22794209527900  | 0.13120869077373  |
| C | 5.51742370493048  | -0.91827635483491 | 1.20118780027549  |
| H | 5.87099098376832  | 0.05182073472181  | 1.55381861547210  |
| C | 4.04249438742110  | -2.22955389911334 | -0.19600067820396 |
| H | 3.23932789469281  | -2.27556950911451 | -0.92643992392896 |
| C | 4.62846473552578  | -3.39426912542661 | 0.29573108294735  |
| H | 4.27156823106241  | -4.35841256734358 | -0.07874688409164 |
| C | -4.42765913054960 | 2.74796056175586  | -0.89851489083054 |
| H | -3.91607579383950 | 3.06452245333095  | -1.81190044439512 |
| C | 6.09107712938154  | -2.08602906687511 | 1.69729702522152  |
| H | 6.89232543552887  | -2.02150127591146 | 2.43734011405562  |
| C | -4.45495414996418 | 1.47176766957287  | 1.14167647740217  |
| H | -3.95452346835921 | 0.80111262193287  | 1.84584947940810  |
| C | -5.67528618232434 | 3.28449738127214  | -0.57910013287091 |
| H | -6.14248684787121 | 4.00714191464437  | -1.25194991196670 |
| C | -5.71107397048799 | 1.98552830071170  | 1.45372361367125  |
| H | -6.20850050997405 | 1.67792475099383  | 2.37702478516439  |
| C | -6.31678813580322 | 2.90776846203625  | 0.60006299041307  |
| H | -7.28306351023179 | 3.34493712792010  | 0.86551024712214  |
| C | -2.71213584833928 | -0.03099410913895 | -2.31875098849173 |
| H | -3.51428040383611 | 0.69697336168140  | -2.50341335758943 |
| H | -3.13497792345819 | -1.01371908857411 | -2.56846158208656 |
| N | -1.10996234867770 | -2.44828622054660 | -1.32482071324450 |
| C | -2.31747751665489 | -2.45651474785860 | -0.76982767066109 |
| C | -2.59163183550944 | -4.76925615612042 | -1.31320023932164 |
| H | -3.17634073341962 | -5.69177047064446 | -1.28935749542226 |
| C | -1.34370116135340 | -4.73750929608446 | -1.92862426058913 |
| H | -0.92197036471212 | -5.61810433108194 | -2.41683100199249 |
| C | -3.10102917404503 | -3.60632139183827 | -0.73343919560260 |
| H | -4.08651210621840 | -3.59523130287527 | -0.26353493016710 |
| C | -0.63190302662574 | -3.53895046367553 | -1.90927914931289 |
| H | 0.35358389159798  | -3.44111617124339 | -2.37491995843931 |
| O | 4.06203166513061  | -0.69059139902534 | -2.65299944428543 |
| O | 4.38594972973472  | 0.31033765591962  | -1.99400174513017 |

**Table S13. Optimized coordinates of intermediate <sup>4</sup>I1**

|    |                   |                   |                   |
|----|-------------------|-------------------|-------------------|
| Cu | -0.15195238726899 | -0.19979769165827 | -0.92800727512246 |
| O  | 1.80355117925599  | -0.54570746292801 | -0.83299707004425 |
| O  | 0.63015286959671  | 1.85946059470794  | -0.26386065338331 |
| N  | -2.22497345176867 | -0.00660355171883 | -0.87515417709297 |
| O  | -0.36261104289687 | 0.17913089213011  | -2.80070320419082 |
| N  | -0.49626298845515 | -0.51733581173632 | 1.12854265175696  |
| O  | 4.57515150987412  | 1.24592066709899  | 0.45836805015941  |
| C  | 1.87701775587324  | 1.73095777778011  | -0.21733968465525 |
| C  | 2.49491108558049  | 0.47230437912993  | -0.52151135829549 |
| C  | 0.36043784961692  | -0.37694847841349 | 2.13558697812245  |
| H  | 1.39296304171029  | -0.13906154099005 | 1.86471952950549  |
| C  | 2.77084960899634  | 2.82377105070868  | 0.19997176104485  |
| O  | -1.91234329947507 | 0.53621635266183  | -4.37897046108172 |
| C  | -1.56387740578629 | 0.22038623774373  | -3.26118480245438 |
| C  | 4.09800093422484  | 2.52506312738759  | 0.52975464580789  |
| C  | -2.47281103203410 | 1.39870283992845  | -0.46109143810025 |

|   |                   |                   |                   |
|---|-------------------|-------------------|-------------------|
| H | -1.98333906718122 | 2.02864579616558  | -1.21757934247086 |
| H | -1.92680640070504 | 1.58542875050725  | 0.47387681084456  |
| C | 4.00992032115664  | 0.37354695877167  | -0.45665484335377 |
| C | -1.77916696333577 | -0.81011107290993 | 1.36901536341719  |
| C | 2.31684594379354  | 4.14021398433453  | 0.34259697533441  |
| H | 1.27551746452706  | 4.34867014659199  | 0.08747375231896  |
| C | -2.61310443949270 | -1.02254861262495 | 0.11337162660749  |
| H | -3.68911003057655 | -0.98719222430974 | 0.35617704429717  |
| C | 5.37566603878205  | -3.63360208760996 | 0.34208743908389  |
| H | 5.71831937605201  | -4.65188614711544 | 0.54381537393838  |
| C | -1.37077574543534 | -0.82917230873246 | 3.72518394578699  |
| H | -1.71816857538873 | -0.94858801123353 | 4.75421712155531  |
| C | 4.50525709355569  | -1.02961876722806 | -0.17950397954436 |
| C | -2.26149409746852 | -0.97670890625176 | 2.66212279086391  |
| H | -3.31367360309930 | -1.21600213495253 | 2.83034285110779  |
| C | 4.96144788001499  | 3.51195237398729  | 0.99870815842089  |
| H | 5.98921292255532  | 3.23946954557262  | 1.24516512319727  |
| C | -3.92930563838779 | 1.77104519602602  | -0.30935255448354 |
| C | 4.49360554124826  | 4.81574962842482  | 1.12998104704296  |
| H | 5.17049909694431  | 5.59504670570829  | 1.48890744587121  |
| C | -0.03808096921399 | -0.52722980455126 | 3.46138106876713  |
| H | 0.68785270961391  | -0.40453113531886 | 4.26649237222878  |
| C | 3.17210402443400  | 5.13463646981092  | 0.79955312232264  |
| H | 2.81488868503435  | 6.16177402861005  | 0.90180122710775  |
| C | 5.17047970675181  | -1.32181616341398 | 1.01183609384415  |
| H | 5.35300136377274  | -0.52327314909414 | 1.73228734684719  |
| C | 4.27434394510651  | -2.04660821497421 | -1.11256730185768 |
| H | 3.74985465084319  | -1.81429115220111 | -2.04039139688854 |
| C | 4.71329465609794  | -3.34082228520497 | -0.85080917166214 |
| H | 4.53653044692000  | -4.12905327372428 | -1.58702429223670 |
| C | -4.65248584527090 | 2.29353177841920  | -1.38881277209688 |
| H | -4.14676626672429 | 2.46253189634940  | -2.34450483106085 |
| C | 5.60285589979014  | -2.62224850519709 | 1.27197344818675  |
| H | 6.12617067480704  | -2.84179407022659 | 2.20608407529707  |
| C | -4.58426315710123 | 1.60111528124466  | 0.91647326600764  |
| H | -4.02011031717674 | 1.23591508064077  | 1.78079859856558  |
| C | -6.00305970101852 | 2.60990097327824  | -1.25290835820444 |
| H | -6.55214085854740 | 3.01698255518804  | -2.10539602137108 |
| C | -5.93483240365361 | 1.91640349640624  | 1.05599691595807  |
| H | -6.42947954218883 | 1.78298150975209  | 2.02148842582338  |
| C | -6.64862372793597 | 2.41606397071495  | -0.03237628540643 |
| H | -7.70680524724930 | 2.66727554731855  | 0.07435775818423  |
| C | -2.64933190457427 | -0.25062593225660 | -2.26271687069186 |
| H | -3.61304833754015 | 0.22328046016174  | -2.49321324612691 |
| H | -2.77765223284385 | -1.32819893504314 | -2.42884506429177 |
| N | -1.01783762513466 | -2.51837140319551 | -0.90235514407931 |
| C | -2.24940435953533 | -2.41346955872295 | -0.40324262213892 |
| C | -2.66524936139628 | -4.73663945172829 | -0.78126134198869 |
| H | -3.31875463716157 | -5.61129401469819 | -0.73732193809147 |
| C | -1.38036377133399 | -4.83966948376309 | -1.30417062748662 |
| H | -0.99512768338761 | -5.78947108653939 | -1.67931402404961 |
| C | -3.11563306197177 | -3.49890242892860 | -0.31983090223354 |
| H | -4.12243228403176 | -3.37713499696450 | 0.08568075187367  |
| C | -0.58715334315702 | -3.69173288833872 | -1.34692829160304 |
| H | 0.42975644764286  | -3.71032397058559 | -1.75119851745812 |
| O | 3.94206659958299  | 0.45283332158274  | -2.78862389738882 |
| O | 4.58588348314887  | 0.85148034023936  | -1.74846619441261 |

**Table S14. Optimized coordinates of the minimum energy crossing point (MECP)**

|    |                   |                   |                   |
|----|-------------------|-------------------|-------------------|
| Cu | -0.15172470081382 | -0.24348763029064 | -0.77835526525677 |
| O  | 1.80236877488369  | -0.60062023292565 | -0.65333535467151 |
| O  | 0.61998449681023  | 1.79746714555692  | -0.06317658641480 |
| N  | -2.22469425770299 | -0.03193033920139 | -0.80793893380153 |
| O  | -0.28446964706686 | 0.17542021419202  | -2.65113033403017 |
| N  | -0.58158367328641 | -0.58173051729661 | 1.25477582860745  |
| O  | 4.61600579760510  | 1.26291515195154  | 0.42098194017850  |
| C  | 1.87016863671960  | 1.68857229825531  | -0.08057185880794 |
| C  | 2.49151017571642  | 0.43570557574429  | -0.40262293092472 |
| C  | 0.23529935275969  | -0.44319072823575 | 2.29416877368081  |
| H  | 1.27946047926646  | -0.21587455534436 | 2.06157718040990  |
| C  | 2.76651964253804  | 2.80186233475169  | 0.27027810287963  |
| O  | -1.76973954289901 | 0.58693737915500  | -4.27761641630808 |
| C  | -1.46666197133793 | 0.23579873199455  | -3.15709230377380 |
| C  | 4.11791159843854  | 2.53237820559908  | 0.51715348748448  |
| C  | -2.47146441831685 | 1.37283450533899  | -0.39131944231142 |
| H  | -1.91811137179357 | 2.00219273837473  | -1.10284940062269 |
| H  | -1.98634208252782 | 1.53501805593349  | 0.58103659584618  |
| C  | 4.00925144257735  | 0.37939991890258  | -0.45591084515264 |
| C  | -1.87705452131289 | -0.85604589179925 | 1.44368299247756  |
| C  | 2.29589444274469  | 4.11046707833107  | 0.43009683198704  |
| H  | 1.23692173007588  | 4.29656117203869  | 0.23837762828028  |
| C  | -2.66244403758738 | -1.05267366642086 | 0.15446048512729  |
| H  | -3.74719881504854 | -1.00985639994519 | 0.35380945285826  |
| C  | 5.58854402421339  | -3.58161862703446 | 0.15171315807956  |
| H  | 5.98884297572277  | -4.58756544663704 | 0.30262628712635  |
| C  | -1.56479196515024 | -0.86413436342542 | 3.81433625542190  |
| H  | -1.95651519371374 | -0.96992944666031 | 4.82880906482851  |
| C  | 4.57291101766951  | -1.00814589549734 | -0.24188320946686 |
| C  | -2.41340450348892 | -1.00856656847440 | 2.71678961894884  |
| H  | -3.47487410423496 | -1.23128895149324 | 2.84462941700469  |
| C  | 4.98928307818901  | 3.54034873533552  | 0.92159173709542  |
| H  | 6.03650954280373  | 3.29148333750190  | 1.10210331133122  |
| C  | -3.92554924163536 | 1.77815404817945  | -0.33487474020769 |
| C  | 4.50385183792450  | 4.83549896099198  | 1.07325676535625  |
| H  | 5.18635474443450  | 5.63127701445550  | 1.38165389080804  |
| C  | -0.21896457054072 | -0.57927235388811 | 3.60369872199846  |
| H  | 0.47394107378138  | -0.45596376733104 | 4.43729171776811  |
| C  | 3.15790565666044  | 5.12519220516915  | 0.82512675925741  |
| H  | 2.78691559735333  | 6.14584206727283  | 0.94194108673651  |
| C  | 5.36337550630538  | -1.28728612436593 | 0.87331724881707  |
| H  | 5.58541673666384  | -0.49123412463650 | 1.58524899433046  |
| C  | 4.28833197633659  | -2.02310438535097 | -1.16241195636704 |
| H  | 3.66745124431975  | -1.79992716456186 | -2.03113466660762 |
| C  | 4.79963494229881  | -3.30195069115176 | -0.96480820154633 |
| H  | 4.58077856625089  | -4.08786546404055 | -1.69212657769939 |
| C  | -4.55243955159816 | 2.34227551360973  | -1.45288511557544 |
| H  | -3.97282016397121 | 2.51158267041157  | -2.36570264680245 |
| C  | 5.86891833411145  | -2.57246524848308 | 1.06926189692084  |
| H  | 6.49121407555583  | -2.78216304681669 | 1.94295041985215  |
| C  | -4.67329733043173 | 1.60271682717054  | 0.83549556528771  |
| H  | -4.18684660847279 | 1.20512978718468  | 1.73219902142773  |
| C  | -5.89980798299053 | 2.69499883398150  | -1.41005449192729 |
| H  | -6.37219010313814 | 3.13419821083587  | -2.29197226424653 |
| C  | -6.02108919753157 | 1.95528894122470  | 0.88186147685163  |
| H  | -6.58875646233811 | 1.82007981313978  | 1.80596959636008  |
| C  | -6.63858983267915 | 2.49670995290365  | -0.24442570598536 |

|   |                   |                   |                   |
|---|-------------------|-------------------|-------------------|
| H | -7.69429572900253 | 2.77678446255046  | -0.20961322626760 |
| C | -2.59114271246554 | -0.25717042212454 | -2.21459764680625 |
| H | -3.54659345908352 | 0.21604377610489  | -2.47843117629542 |
| H | -2.70542425407260 | -1.33265342836011 | -2.40169829389381 |
| N | -1.04476932035018 | -2.54770568870845 | -0.82643941900441 |
| C | -2.28948843993158 | -2.44150999719949 | -0.36141312130411 |
| C | -2.70549450328769 | -4.75786238957839 | -0.77835071273494 |
| H | -3.36348286477710 | -5.63010356663544 | -0.76270124492135 |
| C | -1.40765417972652 | -4.86148665895273 | -1.26805373549302 |
| H | -1.01682269048809 | -5.80812596339384 | -1.64546480531874 |
| C | -3.16247500281222 | -3.52337716965758 | -0.31448391569187 |
| H | -4.17942158275685 | -3.40151597474774 | 0.06459677303841  |
| C | -0.60752657019289 | -3.71771621592280 | -1.27329745255368 |
| H | 0.42048657134939  | -3.73702939409703 | -1.64824808720970 |
| O | 3.75809738953570  | 0.47722668962073  | -2.77588693640510 |
| O | 4.46595069894092  | 0.88978714692210  | -1.78399006205666 |

**Table S15. Optimized coordinates of transition state <sup>2</sup>TS2**

|    |                   |                   |                   |
|----|-------------------|-------------------|-------------------|
| Cu | -0.17217596831368 | 0.04605732907498  | -0.95867338330394 |
| O  | 1.77505963099799  | -0.51717977790720 | -1.05090553484997 |
| O  | 0.91124493788437  | 2.01633282138591  | -0.51164827670362 |
| N  | -2.25465032101697 | 0.03555763977466  | -0.90227120990496 |
| O  | -0.43240654554917 | 0.10359692026730  | -2.86165475590286 |
| N  | -0.59364246429561 | 0.30468512897976  | 1.21605223813299  |
| O  | 4.52022605317588  | 0.53505069026344  | 0.69315893976432  |
| C  | 2.09943467130348  | 1.68769652816647  | -0.29919926999535 |
| C  | 2.57296925518409  | 0.37928253235357  | -0.71710791587904 |
| C  | 0.11168962777794  | 0.93813127943489  | 2.15178580485781  |
| H  | 1.13603869633882  | 1.21344790243567  | 1.89674584075129  |
| C  | 2.98687122003764  | 2.41242267807289  | 0.62560830699350  |
| O  | -2.03524279881239 | -0.03399128144664 | -4.42315519035404 |
| C  | -1.62873106596744 | -0.12616545605000 | -3.28445568686776 |
| C  | 4.12609687322770  | 1.76529635680321  | 1.13744211364289  |
| C  | -2.73543969923563 | 1.44354637564014  | -0.87066875497184 |
| H  | -2.34099498272358 | 1.91971098924401  | -1.77945296609850 |
| H  | -2.25664384457998 | 1.95146029796550  | -0.02269022693463 |
| C  | 4.08843126047714  | 0.16746320083017  | -0.58595221777420 |
| C  | -1.85924886820303 | -0.04076858014989 | 1.47660370619506  |
| C  | 2.59048457506816  | 3.63256863927411  | 1.18590677629155  |
| H  | 1.69111522259114  | 4.09921083989513  | 0.77750978332547  |
| C  | -2.55949595423750 | -0.73101276588249 | 0.31688834185422  |
| H  | -3.64417431537163 | -0.79232531213900 | 0.50904833545577  |
| C  | 5.56190330629830  | -3.70874554084827 | -1.70571810541900 |
| H  | 5.96575437283606  | -4.67331971334985 | -2.02667752193442 |
| C  | -1.73383264615704 | 0.89227370552696  | 3.67599230792865  |
| H  | -2.19125728680933 | 1.14318840992057  | 4.63660426154431  |
| C  | 4.57836176874352  | -1.21673437980988 | -0.92321289770676 |
| C  | -2.46348924712252 | 0.20917415776045  | 2.70463003918824  |
| H  | -3.49421760065058 | -0.10405046873056 | 2.88522166311001  |
| C  | 4.84507117754587  | 2.32698364407359  | 2.19241020632144  |
| H  | 5.71344849828535  | 1.79056354723236  | 2.58005222394238  |
| C  | -4.23938938640096 | 1.58568009273685  | -0.79633952423214 |
| C  | 4.42719232971396  | 3.53450223911221  | 2.74161442310931  |
| H  | 4.99208633094584  | 3.97163779908376  | 3.56876621448464  |
| C  | -0.42420880576418 | 1.26589165352742  | 3.39504873946875  |
| H  | 0.18328643226704  | 1.81081812473842  | 4.11909523031954  |

|   |                   |                   |                   |
|---|-------------------|-------------------|-------------------|
| C | 3.29643735051786  | 4.19187814440330  | 2.24157353472166  |
| H | 2.95992863224946  | 5.12991761132464  | 2.69007671902042  |
| C | 5.48287696310946  | -1.89625451686953 | -0.10856044956628 |
| H | 5.80922409023345  | -1.44272569308872 | 0.82833085301133  |
| C | 4.15269959368652  | -1.79175401638666 | -2.12554877939178 |
| H | 3.44883429673821  | -1.25186598986379 | -2.76094117367537 |
| C | 4.63450936189665  | -3.03949602026855 | -2.50674863043287 |
| H | 4.28201893028119  | -3.48977224188571 | -3.43853301800116 |
| C | -5.01505836901596 | 1.63552361420810  | -1.96117738774205 |
| H | -4.52233715491085 | 1.64898969081213  | -2.93809753632651 |
| C | 5.98314708093011  | -3.13627253842680 | -0.50770278131248 |
| H | 6.70339473815574  | -3.65894955287028 | 0.12664586408170  |
| C | -4.88690535714487 | 1.63433900118489  | 0.44408387106692  |
| H | -4.28780740052209 | 1.65936568887073  | 1.35776389500667  |
| C | -6.40581208652247 | 1.67118035554000  | -1.88282052844075 |
| H | -6.99975997915290 | 1.70132161930287  | -2.79893829537183 |
| C | -6.27700964336166 | 1.66912308477977  | 0.52596157588763  |
| H | -6.77052418464693 | 1.70438679825201  | 1.50086439693476  |
| C | -7.03855875742034 | 1.67412945174459  | -0.64092574303650 |
| H | -8.12953769157051 | 1.69989960084660  | -0.57980078866789 |
| C | -2.59567709162241 | -0.60900406176677 | -2.18205390214378 |
| H | -3.63817332527795 | -0.42331667096488 | -2.47503574449562 |
| H | -2.45721921699710 | -1.69508244020575 | -2.09606843972857 |
| N | -0.78325587152070 | -2.22197539733374 | -0.34793375861670 |
| C | -1.97937169775951 | -2.13482973351947 | 0.22897373287810  |
| C | -1.99849991085046 | -4.47916570425923 | 0.68704527688600  |
| H | -2.47947563676349 | -5.36605090302907 | 1.10741297252362  |
| C | -0.76461938353485 | -4.57074772175865 | 0.05087136971502  |
| H | -0.25206559023567 | -5.52737698422445 | -0.06607453363080 |
| C | -2.62330705960426 | -3.23649811607909 | 0.78077891902866  |
| H | -3.59473139703324 | -3.12142661261491 | 1.26721128153180  |
| C | -0.18409857111891 | -3.40258945552414 | -0.44356359958802 |
| H | 0.79426853700382  | -3.40198882713565 | -0.93352333354046 |
| O | 3.67448990156911  | 1.49011316990691  | -2.33385805610575 |
| O | 4.64445146072655  | 1.14903711963868  | -1.47608984032827 |

**Table S16. Optimized coordinates of intermediate <sup>2</sup>I2**

|    |                   |                   |                   |
|----|-------------------|-------------------|-------------------|
| Cu | -0.15312883844894 | -0.06202747389305 | -0.99691282698326 |
| O  | 1.72191826536025  | -0.44103559054363 | -1.04459167896955 |
| O  | 0.87899775685899  | 2.10036198225399  | -0.44920126759073 |
| N  | -2.22626890800114 | 0.03167671145928  | -0.86237463591335 |
| O  | -0.52987621415652 | 0.31490872321128  | -2.87496041336078 |
| N  | -0.56050868840771 | 0.21420973207315  | 1.27419322615754  |
| O  | 4.64703935677612  | 0.75394141715379  | 0.41086866669845  |
| C  | 2.04680994265043  | 1.78239544172634  | -0.30570058986087 |
| C  | 2.57479314608040  | 0.53870362366972  | -1.02791072654797 |
| C  | 0.15641379058304  | 0.79332804028365  | 2.23236833495954  |
| H  | 1.19451851163288  | 1.03336266797818  | 1.99240489111874  |
| C  | 2.94777111279021  | 2.46853627817091  | 0.63056133272099  |
| O  | -2.20580983858752 | 0.23428995060523  | -4.36772726174189 |
| C  | -1.72699238484680 | 0.05651383317500  | -3.26458758742870 |
| C  | 4.16157983898313  | 1.86604346366257  | 0.99457243731046  |
| C  | -2.66529160627991 | 1.45091360551122  | -0.78520629470063 |
| H  | -2.20459566437861 | 1.95822285773752  | -1.64341415731178 |
| H  | -2.22421770585607 | 1.90211989408042  | 0.11262096691351  |

|   |                   |                   |                   |
|---|-------------------|-------------------|-------------------|
| C | 4.08210629745377  | 0.25785184198364  | -0.76785898033574 |
| C | -1.83558423468531 | -0.10354441377174 | 1.51604995779240  |
| C | 2.50567380510011  | 3.60827385194207  | 1.32031125822777  |
| H | 1.55386353966343  | 4.04167575521722  | 1.00346145572491  |
| C | -2.53980003706983 | -0.75848650690527 | 0.33572192561237  |
| H | -3.62521109104556 | -0.82076838760366 | 0.52603950479755  |
| C | 5.48803100726842  | -3.74390787706958 | -1.48354409134542 |
| H | 5.87722982341455  | -4.74175160598419 | -1.70701168476194 |
| C | -1.70244051740409 | 0.76761561032398  | 3.74027713130315  |
| H | -2.16052473962655 | 1.00533739737986  | 4.70389079416425  |
| C | 4.54961530184018  | -1.16486282843172 | -0.95834718801570 |
| C | -2.44515273071787 | 0.13430930681009  | 2.74458390123419  |
| H | -3.48601317599607 | -0.15343432240302 | 2.90882595520941  |
| C | 4.90114751073044  | 2.38597690818956  | 2.06527426347764  |
| H | 5.82509276494510  | 1.87999083145968  | 2.35285135130506  |
| C | -4.16567462091680 | 1.62720873041231  | -0.79356637807213 |
| C | 4.43806492397152  | 3.50434995165543  | 2.74329175457745  |
| H | 5.02246459574710  | 3.90282490116693  | 3.57652358149159  |
| C | -0.37752496520739 | 1.10495436069742  | 3.48185247376769  |
| H | 0.24007524867140  | 1.60661934831848  | 4.22828523765135  |
| C | 3.23845153134770  | 4.13151192507991  | 2.37134140530867  |
| H | 2.88123117053373  | 5.00942095253052  | 2.91355008079763  |
| C | 5.42860514893619  | -1.78438953354343 | -0.07006691142750 |
| H | 5.76231832520961  | -1.24948636252439 | 0.81967189622374  |
| C | 4.12400868340705  | -1.84787672733189 | -2.10421112494011 |
| H | 3.43219233848727  | -1.35667402391060 | -2.79010421633728 |
| C | 4.58417232183688  | -3.13566452420813 | -2.35816350130393 |
| H | 4.23941911596535  | -3.66463175336614 | -3.25028302700687 |
| C | -4.86391333989451 | 1.69988297126046  | -2.00660163321811 |
| H | -4.30690854622465 | 1.69757714047388  | -2.94901583516776 |
| C | 5.90290619316584  | -3.07108356725892 | -0.33653772236593 |
| H | 6.60389453764025  | -3.54426337173575 | 0.35562599563987  |
| C | -4.88642546664020 | 1.67070761706974  | 0.40525666439014  |
| H | -4.34489421575859 | 1.67061939536714  | 1.35517142178882  |
| C | -6.25633450667014 | 1.74968781864214  | -2.01553305917160 |
| H | -6.79274679730501 | 1.78938046765772  | -2.96643906835687 |
| C | -6.27908415821828 | 1.72612418133132  | 0.39860370698005  |
| H | -6.83209050331300 | 1.75687466133627  | 1.34080114290601  |
| C | -6.96508257331071 | 1.75040769112002  | -0.81439091581468 |
| H | -8.05729626305560 | 1.78652723062181  | -0.82431668824533 |
| C | -2.60891015423576 | -0.56114286593994 | -2.15458884155897 |
| H | -3.67457617159999 | -0.42050786477191 | -2.38047760546711 |
| H | -2.40414565410408 | -1.64013179920198 | -2.13601605449641 |
| N | -0.77060594870430 | -2.21754612511182 | -0.40174340497364 |
| C | -1.95322838408668 | -2.15681632722088 | 0.20894180895273  |
| C | -1.91116215149317 | -4.50510253373303 | 0.64515517475296  |
| H | -2.36473729816559 | -5.40510235382441 | 1.06848697610019  |
| C | -0.68901554676737 | -4.56532840469559 | -0.01850076609403 |
| H | -0.15704782041999 | -5.50931601126030 | -0.15044502833149 |
| C | -2.56016219560734 | -3.27667106491521 | 0.76548286361475  |
| H | -3.52021736821989 | -3.18616263264223 | 1.27841864383339  |
| C | -0.14389231413551 | -3.38229926998494 | -0.51845133988867 |
| H | 0.82536494386043  | -3.35024621453308 | -1.02516423166504 |
| O | 3.02474473886577  | 1.09891119854918  | -2.33375023248185 |
| O | 4.40124774978553  | 1.08212206897141  | -1.87856321225133 |

**Table S17. Optimized coordinates of transition state <sup>2</sup>TS3**

|    |                   |                   |                   |
|----|-------------------|-------------------|-------------------|
| Cu | -0.19238948453682 | 0.17621586773731  | -0.66024275158889 |
| O  | 1.75034055541677  | -0.63750118874317 | -0.66022505511530 |
| O  | 1.00145499169723  | 1.99311504936719  | -0.32322883771986 |
| N  | -2.27969267563455 | 0.06221403577399  | -0.77229275875660 |
| O  | -0.29940614176828 | 0.16170510753265  | -2.57426618573068 |
| N  | -0.75491806181088 | 0.48193509021403  | 1.38984422355438  |
| O  | 4.68564703701835  | 0.48279005194177  | 0.59084484187176  |
| C  | 2.20001530854703  | 1.65937178420707  | -0.22710044272062 |
| C  | 2.58344632973077  | 0.26598813475786  | -0.57839104074677 |
| C  | -0.10213489686193 | 1.14466641206809  | 2.34310634237620  |
| H  | 0.87906366150729  | 1.54116433184144  | 2.07338765332358  |
| C  | 3.15455918434628  | 2.36159377206895  | 0.66879293300845  |
| O  | -1.77815941028571 | -0.00659472865709 | -4.25179610530495 |
| C  | -1.45423896064384 | -0.09814102109924 | -3.08671068700533 |
| C  | 4.30515100410698  | 1.68411395720061  | 1.10643293002732  |
| C  | -2.80235469000535 | 1.45174655339777  | -0.81892609113418 |
| H  | -2.33132686401674 | 1.92718622628452  | -1.69132901169721 |
| H  | -2.43518737478976 | 1.99183635793443  | 0.06437879294047  |
| C  | 4.11106133590426  | 0.12328979827009  | -0.64862362843699 |
| C  | -1.99006135266280 | 0.02230285407061  | 1.62605129756959  |
| C  | 2.79762353638345  | 3.57096217295834  | 1.26710902010889  |
| H  | 1.89043177620531  | 4.05936417188728  | 0.90323009033453  |
| C  | -2.63304183953562 | -0.68738816968942 | 0.44393869746114  |
| H  | -3.72392983405999 | -0.75886719873452 | 0.59216537948409  |
| C  | 5.60288033067075  | -3.63953474833129 | -2.07164382271770 |
| H  | 6.00693918273440  | -4.57202823554323 | -2.47580699409490 |
| C  | -1.92457314337992 | 0.85297378890013  | 3.86861501388347  |
| H  | -2.39059416677528 | 1.00664060347198  | 4.84510496693560  |
| C  | 4.62827696932505  | -1.22024402753033 | -1.08446411145973 |
| C  | -2.60759287429793 | 0.17035026321351  | 2.86308793774433  |
| H  | -3.61070585200761 | -0.22993579152993 | 3.02613407529709  |
| C  | 5.07272887690868  | 2.21259078332386  | 2.14658791979304  |
| H  | 5.95253423320812  | 1.66107267181736  | 2.48339457494527  |
| C  | -4.30688854074962 | 1.55191496411470  | -0.90965242144880 |
| C  | 4.68967225472460  | 3.40930692497875  | 2.74526144478974  |
| H  | 5.29070825414001  | 3.81385981650316  | 3.56360583244489  |
| C  | -0.65443418496988 | 1.35603504607513  | 3.60428950812597  |
| H  | -0.09415031056322 | 1.91336836127070  | 4.35580215700406  |
| C  | 3.55221840983305  | 4.09714246980004  | 2.30902216038518  |
| H  | 3.24875082416152  | 5.02905107523974  | 2.79199447016185  |
| C  | 5.63731829097877  | -1.89437188319487 | -0.40031993627906 |
| H  | 6.04621576047931  | -1.46108135809645 | 0.51351895980811  |
| C  | 4.08629559982035  | -1.76851995822833 | -2.25260608739343 |
| H  | 3.29327091506710  | -1.23410124638771 | -2.78116399874472 |
| C  | 4.56765677085695  | -2.97922465883994 | -2.73811604059745 |
| H  | 4.13316564372342  | -3.40915043201728 | -3.64440728473414 |
| C  | -4.94571768120462 | 1.58381037544161  | -2.15592194599279 |
| H  | -4.34346113515614 | 1.59279643544854  | -3.06957999593506 |
| C  | 6.13228953832609  | -3.09874898438474 | -0.90232722580357 |
| H  | 6.93464506756166  | -3.61800339060253 | -0.37244477596052 |
| C  | -5.08822828502471 | 1.59146809417380  | 0.25151424390407  |
| H  | -4.59702982926725 | 1.62445210162474  | 1.22886145130426  |
| C  | -6.33716232284716 | 1.60364822491863  | -2.23621813726790 |
| H  | -6.82743254204501 | 1.62273477916099  | -3.21254973937377 |
| C  | -6.47935810995773 | 1.60975963993643  | 0.17372519681650  |
| H  | -7.07796317792306 | 1.63843202458086  | 1.08738248593120  |
| C  | -7.10474108273279 | 1.60591701716558  | -1.07220824129167 |

|   |                   |                   |                   |
|---|-------------------|-------------------|-------------------|
| H | -8.19547662288061 | 1.62077257704310  | -1.13841454036471 |
| C | -2.48025531023688 | -0.62136778912697 | -2.05792575736432 |
| H | -3.50519636933327 | -0.50865695187086 | -2.43740345848893 |
| H | -2.27455003790901 | -1.69345963603682 | -1.93771046098116 |
| N | -0.74806467775528 | -2.10930826753826 | 0.02729306297647  |
| C | -2.02798714708167 | -2.08317462711379 | 0.39106164424162  |
| C | -2.05896775606064 | -4.45499212703510 | 0.66204918592705  |
| H | -2.58246877956518 | -5.38056974807194 | 0.91359626932089  |
| C | -0.72401031053990 | -4.47734693662292 | 0.27158645638755  |
| H | -0.17059431039889 | -5.41463779173963 | 0.19213055318997  |
| C | -2.72961982043215 | -3.23290064621532 | 0.73198792364708  |
| H | -3.77438170494103 | -3.17308877782862 | 1.04558933137923  |
| C | -0.10048748360044 | -3.26512943472236 | -0.03321822818775 |
| H | 0.94505535553052  | -3.20600980456360 | -0.35379498040120 |
| O | 3.00735276752397  | 1.47925225961493  | -1.93211713112705 |
| O | 4.35216538981105  | 1.12516753276403  | -1.59933111643720 |

**Table S18. Optimized coordinates of intermediate <sup>2</sup>I3**

|    |                   |                   |                   |
|----|-------------------|-------------------|-------------------|
| Cu | -0.24819352460616 | 0.44021677297269  | -0.42427025638325 |
| O  | 2.05155756423586  | -0.92376874278098 | -0.04574691540188 |
| O  | 1.10704544735019  | 1.79676688779716  | -0.17902480790952 |
| N  | -2.34173540835298 | 0.15287035776331  | -0.80819511869464 |
| O  | 0.00503868874400  | -0.08872220625242 | -2.22880795029045 |
| N  | -1.01832954300425 | 0.83826857923516  | 1.43186559867535  |
| O  | 4.94671139357828  | 0.37335918417270  | 0.41651270828451  |
| C  | 2.38213861383208  | 1.49133842348894  | -0.27013182236321 |
| C  | 2.74498344030301  | 0.01316347930179  | -0.31369877390097 |
| C  | -0.41285890395514 | 1.53580808945390  | 2.38981512434918  |
| H  | 0.57064094799042  | 1.93059704979040  | 2.11998747168387  |
| C  | 3.26688889449871  | 2.06265932736549  | 0.84590795419646  |
| O  | -0.94312479275053 | -1.33734129070368 | -3.81755734599174 |
| C  | -0.97653135631487 | -0.71610104226101 | -2.77747744496816 |
| C  | 4.48780276714880  | 1.44222228382507  | 1.14211425766176  |
| C  | -2.92613266886740 | 1.49706707795039  | -1.02401746139134 |
| H  | -2.46332069928937 | 1.89163935858217  | -1.93960268993514 |
| H  | -2.60237277350237 | 2.15783320933450  | -0.20668641190499 |
| C  | 4.20430466019182  | 0.06631823801511  | -0.75909853473495 |
| C  | -2.23504104763901 | 0.31753136931243  | 1.62152556055442  |
| C  | 2.85508470814381  | 3.15926334569567  | 1.59557204119646  |
| H  | 1.91407064398837  | 3.63413971386294  | 1.30609287588178  |
| C  | -2.75618357852848 | -0.49857091473032 | 0.44339896038822  |
| H  | -3.85015597187725 | -0.61705914775695 | 0.52250891190546  |
| C  | 5.72535913981057  | -3.42638327970683 | -2.72738349652027 |
| H  | 6.11396973912772  | -4.30631717571204 | -3.24687664070117 |
| C  | -2.27732106226265 | 1.18987979693509  | 3.84925287705519  |
| H  | -2.77925472208442 | 1.33318083904914  | 4.80913477082298  |
| C  | 4.76115876509016  | -1.15958468756738 | -1.42442311972873 |
| C  | -2.90027063630726 | 0.46195335943334  | 2.83465883610083  |
| H  | -3.88651195264093 | 0.01525935363160  | 2.97958486911913  |
| C  | 5.25699851626116  | 1.88714076840590  | 2.21676056481138  |
| H  | 6.19242078950191  | 1.37334269898849  | 2.44714449010861  |
| C  | -4.43590088984019 | 1.52742758526175  | -1.12790003615367 |
| C  | 4.81580525066733  | 2.97048507346840  | 2.97661030154412  |
| H  | 5.42452831589447  | 3.32095252569188  | 3.81367750920256  |
| C  | -1.01840691170258 | 1.74177579021163  | 3.62637875004354  |
| H  | -0.50698020435426 | 2.32218965051921  | 4.39501606004142  |



|   |                   |                   |                   |
|---|-------------------|-------------------|-------------------|
| C | 3.61868398982693  | 3.61893903870092  | 2.66592273937203  |
| H | 3.28035181603838  | 4.47393240543843  | 3.25584135853672  |
| C | 5.89530988003139  | -1.80906651984207 | -0.94061644733556 |
| H | 6.39708181799934  | -1.42092768973652 | -0.05357387884480 |
| C | 4.09844141290335  | -1.64938459771863 | -2.55418869397076 |
| H | 3.20441302029481  | -1.14005329412280 | -2.92505289761146 |
| C | 4.57988136242541  | -2.78391660226453 | -3.20092217197946 |
| H | 4.05505182124661  | -3.17206439670852 | -4.07725256976325 |
| C | -5.08280947324982 | 1.47839251324373  | -2.36818806685364 |
| H | -4.49202198588496 | 1.47146569946703  | -3.28836119916017 |
| C | 6.37595318330272  | -2.94317523991316 | -1.59409666036434 |
| H | 7.26286240680021  | -3.45299590409574 | -1.20922349306125 |
| C | -5.21933298214952 | 1.59384319671446  | 0.03233774585270  |
| H | -4.72932206449111 | 1.69417590193559  | 1.00540410367582  |
| C | -6.47498193935600 | 1.45853661711192  | -2.44488947618175 |
| H | -6.96779574548837 | 1.42353444287184  | -3.41945341340010 |
| C | -6.60988931231448 | 1.55831248772079  | -0.03880817366191 |
| H | -7.20513075680991 | 1.60345896406158  | 0.87644833946403  |
| C | -7.24002075832868 | 1.48591272464201  | -1.28050834605543 |
| H | -8.33084493759257 | 1.46431715266382  | -1.34252081908805 |
| C | -2.34380903322004 | -0.67092450233458 | -2.03363575222765 |
| H | -3.09451895622627 | -0.30573923700832 | -2.74780749838231 |
| H | -2.63181402915785 | -1.70690145321676 | -1.81114408596503 |
| N | -0.80733402737234 | -1.87291338427858 | 0.19772285641818  |
| C | -2.08881487762823 | -1.86140489116792 | 0.55438736111709  |
| C | -2.04223326038239 | -4.19324572059206 | 1.06154104826313  |
| H | -2.53025569404901 | -5.10403354382143 | 1.41727310514821  |
| C | -0.71856441740778 | -4.21377269738190 | 0.63384574806321  |
| H | -0.14062168346536 | -5.13927788419072 | 0.61970656350696  |
| C | -2.74940551726108 | -2.99167341659615 | 1.02101257009907  |
| H | -3.79290827073824 | -2.93280759362525 | 1.33916148667113  |
| C | -0.13237768018987 | -3.01735016520207 | 0.21572761450537  |
| H | 0.90648909258873  | -2.95939509550475 | -0.12129403903988 |
| O | 2.94972766518207  | 1.86831660800566  | -1.55563760943507 |
| O | 4.21133929564538  | 1.15661237470004  | -1.64286401496493 |

**Table S19.** Optimized coordinates of transition state <sup>2</sup>TS4

|    |                   |                   |                   |
|----|-------------------|-------------------|-------------------|
| Cu | -0.31724842109239 | 0.38549631843977  | 0.27197061719522  |
| O  | 2.50690011428000  | -1.06357924282924 | 0.38606937763923  |
| O  | 1.19368502831497  | 1.25841589426338  | 1.02066588237520  |
| N  | -2.30268730357355 | 0.10255869589241  | -0.42488503885657 |
| O  | 0.19302569400926  | -0.12605559407136 | -1.50225075050100 |
| N  | -1.35700246674054 | 0.73862524533937  | 2.00464523231405  |
| O  | 5.06000535660286  | 0.83671963166423  | -0.36175418846039 |
| C  | 2.27454366160493  | 1.47527192815660  | 0.26626374115192  |
| C  | 2.87871727084115  | -0.06171500152421 | -0.07400057732686 |
| C  | -0.86272539333964 | 1.32468215085451  | 3.09193776446147  |
| H  | 0.14421012312117  | 1.73778995274947  | 2.97102824243413  |
| C  | 3.46931413615575  | 2.10634309236381  | 0.99313191003935  |
| O  | -0.59186511212031 | -0.92149022696892 | -3.43783969185306 |
| C  | -0.72818903262945 | -0.55996189680945 | -2.28779248353510 |
| C  | 4.77173255374037  | 1.79405577724001  | 0.57149809629404  |
| C  | -2.83683199299013 | 1.46068517180192  | -0.68775685018568 |
| H  | -2.13573958323039 | 1.93651886508932  | -1.39004492287905 |
| H  | -2.78923275300422 | 2.03784199230047  | 0.24648284636022  |
| C  | 4.00492731921676  | 0.27964883017625  | -1.16131360177332 |

|   |                   |                   |                   |
|---|-------------------|-------------------|-------------------|
| C | -2.56578002914270 | 0.17112530743718  | 2.00747891259663  |
| C | 3.28805830956247  | 3.07020770031258  | 1.98312423589771  |
| H | 2.26729299655930  | 3.31066786489102  | 2.29229356048623  |
| C | -2.89684086195989 | -0.59369503023494 | 0.72858203049056  |
| H | -3.98721431052638 | -0.73267975021035 | 0.62843812628347  |
| C | 5.32671705076804  | -3.41803878570918 | -2.91485151222373 |
| H | 5.67759948590557  | -4.34117507552084 | -3.38470092464674 |
| C | -2.84803581024880 | 0.77300957104455  | 4.30593745293626  |
| H | -3.43817928979820 | 0.76958456106844  | 5.22523314000872  |
| C | 4.47617411917181  | -1.03273923521531 | -1.76597723200708 |
| C | -3.35532461611616 | 0.17293622143479  | 3.15235157776932  |
| H | -4.33746573097172 | -0.30371466349785 | 3.14791457618367  |
| C | 5.86632065632662  | 2.43899426731668  | 1.15128934220928  |
| H | 6.86304541523908  | 2.16653264223635  | 0.79558084095323  |
| C | -4.23866644616927 | 1.50342100289381  | -1.25160935935397 |
| C | 5.66619018615362  | 3.40149199694952  | 2.13871405425428  |
| H | 6.52637752723948  | 3.90891514586694  | 2.58338491556424  |
| C | -1.58823641676855 | 1.36561642580054  | 4.27897766622153  |
| H | -1.16258658188847 | 1.84790595263808  | 5.16053662299825  |
| C | 4.37498815304269  | 3.72434863477750  | 2.55955390183073  |
| H | 4.21318822575165  | 4.48379635361389  | 3.32764714340762  |
| C | 5.62230203817445  | -1.66202578919358 | -1.28284992069710 |
| H | 6.18231152653026  | -1.20278453857422 | -0.46773525912264 |
| C | 3.72691720416291  | -1.60532023827363 | -2.79550855000833 |
| H | 2.81284573916332  | -1.11234371510039 | -3.13837673240194 |
| C | 4.16211691455986  | -2.79767860413442 | -3.37080159276387 |
| H | 3.58453845341161  | -3.24711528057926 | -4.18198507854990 |
| C | -4.44610840047812 | 1.53280090245117  | -2.63627724616253 |
| H | -3.58477602469269 | 1.57172125211097  | -3.30918285690170 |
| C | 6.04535203188238  | -2.85814698570230 | -1.85991214310396 |
| H | 6.94253746260263  | -3.35247932571441 | -1.47766649302497 |
| C | -5.35579770375875 | 1.50760677811117  | -0.40822827588809 |
| H | -5.21101521395953 | 1.54095290087930  | 0.67721118285315  |
| C | -5.73453533697367 | 1.52176757009306  | -3.16563129506182 |
| H | -5.87783536029311 | 1.53996318587351  | -4.24860959577220 |
| C | -6.64707122742918 | 1.49867704651159  | -0.93466268877917 |
| H | -7.50907553976331 | 1.50489123321515  | -0.26398849409148 |
| C | -6.83867271662695 | 1.49753434977241  | -2.31571768839176 |
| H | -7.84821869616206 | 1.49152022010040  | -2.73437257068625 |
| C | -2.14673942817786 | -0.67900024358967 | -1.66657404426624 |
| H | -2.88568984568142 | -0.39081133276227 | -2.42376945059558 |
| H | -2.32328723833506 | -1.74501464890078 | -1.47143817371061 |
| N | -0.88144302278830 | -1.89714545776009 | 0.84046695552473  |
| C | -2.21324256648138 | -1.95152927355451 | 0.87225144391022  |
| C | -2.17481367353655 | -4.33064737419553 | 1.06408147251332  |
| H | -2.68933091709991 | -5.29044525681628 | 1.15239226642613  |
| C | -0.78678178659971 | -4.27194196470715 | 0.99485781275218  |
| H | -0.17938834294444 | -5.17779226459474 | 1.01992925598601  |
| C | -2.91043451967939 | -3.14546876754208 | 1.00694399472874  |
| H | -4.00187122743898 | -3.14711311144703 | 1.04434646616208  |
| C | -0.17535237421046 | -3.02017324354014 | 0.88956660826174  |
| H | 0.91079085570507  | -2.90208178706870 | 0.82451980052654  |
| O | 2.11629106009048  | 1.97610033365563  | -0.93594380061352 |
| O | 3.44929764553102  | 1.08144073895508  | -2.00131498580521 |

**Table S20. Optimized coordinates of products (<sup>2</sup>P)**

|    |                   |                   |                   |
|----|-------------------|-------------------|-------------------|
| Cu | -0.00366370147796 | -0.60426085834486 | 0.20069936103943  |
| O  | 2.41815343672317  | -3.41067501445924 | 0.30018671100144  |
| O  | 1.78411628002208  | -0.41438224771043 | 0.98162155825211  |
| N  | -1.95598193351898 | -0.44653163389173 | -0.49938367064924 |
| O  | 0.36879755897622  | -1.22921379561780 | -1.57917851694081 |
| N  | -0.91005982220766 | 0.29406834599679  | 1.89637344723809  |
| O  | 3.60710477134863  | 3.06813535524412  | -0.58574256029300 |
| C  | 2.07555629948509  | 0.77925348268458  | 0.61599910194676  |
| C  | 3.38331379700307  | -2.82293540459269 | 0.27727082693660  |
| C  | -0.33482903016437 | 0.98898442973596  | 2.87301026247206  |
| H  | 0.75758157171658  | 0.95800512431930  | 2.90354039428080  |
| C  | 3.37457072684712  | 1.32915264640941  | 1.12754121622736  |
| O  | -0.61391185848280 | -1.87017590896432 | -3.47805400987846 |
| C  | -0.64432601995665 | -1.52277773244092 | -2.31438637502772 |
| C  | 4.02502741184787  | 2.42716638713958  | 0.54080562707768  |
| C  | -2.12038346322090 | 0.94009901465969  | -1.02485312032591 |
| H  | -1.26480351534616 | 1.13036682975776  | -1.68910638810225 |
| H  | -2.01200849611146 | 1.64048128457000  | -0.18548681665144 |
| C  | 3.11676297648664  | 2.47834554707079  | -1.72642162388066 |
| C  | -2.24390594132187 | 0.23433090217142  | 1.80583898928062  |
| C  | 3.94487009454400  | 0.74784141305986  | 2.26665942405963  |
| H  | 3.44286050669654  | -0.12649015608853 | 2.68674106450790  |
| C  | -2.72259401470282 | -0.72747799829078 | 0.72317026423194  |
| H  | -3.81298283196054 | -0.64335376457830 | 0.57752056536196  |
| C  | 4.32754845189450  | -1.47763712893479 | -2.85583330895428 |
| H  | 4.63146556574644  | -2.47938317427020 | -3.17342490038323 |
| C  | -2.47255864357113 | 1.67263286753736  | 3.70282514424369  |
| H  | -3.09423085977199 | 2.23045115520801  | 4.40629115998385  |
| C  | 3.57237252979813  | 1.09030443516678  | -2.05948681174461 |
| C  | -3.06827815662096 | 0.91645428810567  | 2.69086976893691  |
| H  | -4.15482578200709 | 0.85980762505525  | 2.59128848674063  |
| C  | 5.17677380218314  | 2.95301713590866  | 1.13198886093560  |
| H  | 5.65344369088317  | 3.80569572153528  | 0.64483965384895  |
| C  | -3.42388693565755 | 1.15936770904617  | -1.75829329192504 |
| C  | 5.70503363804729  | 2.38206104879018  | 2.28320238076580  |
| H  | 6.60094790499359  | 2.81312917110327  | 2.73718100936945  |
| C  | -1.08531977162222 | 1.70424027374745  | 3.80475105804824  |
| H  | -0.58109598938279 | 2.27161550716175  | 4.58790054293764  |
| C  | 5.09694527553561  | 1.26080662782251  | 2.84980217360642  |
| H  | 5.52558448664529  | 0.78326784889618  | 3.73388172992952  |
| C  | 4.79637988817853  | 0.55461221283956  | -1.64030822047277 |
| H  | 5.47021251844182  | 1.13635870777250  | -1.00985016333190 |
| C  | 2.72977494546858  | 0.32633546918230  | -2.87110018061870 |
| H  | 1.76502984181458  | 0.73659882844022  | -3.17314324297983 |
| C  | 3.10350746735200  | -0.95412123881281 | -3.26714592977902 |
| H  | 2.40996913706122  | -1.54830822649483 | -3.86502551805518 |
| C  | -3.46250375559097 | 1.11863496768055  | -3.15600588591426 |
| H  | -2.52907944176986 | 1.00407339790768  | -3.71572902129579 |
| C  | 5.16820840971088  | -0.72711710420612 | -2.03313364075617 |
| H  | 6.11208558843531  | -1.14843567701891 | -1.67733055009641 |
| C  | -4.62597096412539 | 1.33166752064199  | -1.06174065826961 |
| H  | -4.60540308082806 | 1.43993107686741  | 0.02714285911440  |
| C  | -4.67709239697525 | 1.18634235989587  | -3.83557113402334 |
| H  | -4.68989830972353 | 1.13876185444932  | -4.92725218778341 |
| C  | -5.84421404049504 | 1.37885944440784  | -1.73626159103310 |
| H  | -6.77393183881646 | 1.49518045047069  | -1.17415164938027 |
| C  | -5.87240815729431 | 1.29325220812180  | -3.12746427661927 |

|   |                   |                   |                   |
|---|-------------------|-------------------|-------------------|
| H | -6.82383142198801 | 1.32395731247186  | -3.66419344465667 |
| C | -2.01393497600235 | -1.43998678341603 | -1.58931981817782 |
| H | -2.80607852505309 | -1.21003920773481 | -2.31570910549225 |
| H | -2.22549329220452 | -2.43341751168423 | -1.17284938166617 |
| N | -1.14448563317018 | -2.53930464217122 | 1.06377012055996  |
| C | -2.38080610229051 | -2.10531882985871 | 1.29839749588043  |
| C | -2.81236858660578 | -3.95737428435374 | 2.75064189512662  |
| H | -3.47027506307691 | -4.50935035917235 | 3.42591148361791  |
| C | -1.52765559534671 | -4.41960110069072 | 2.47916812882602  |
| H | -1.14397480371069 | -5.33524952973112 | 2.93321228429219  |
| C | -3.25792384766055 | -2.78616763605010 | 2.14071043314345  |
| H | -4.25745547898500 | -2.39284346849633 | 2.34378218542478  |
| C | -0.72890491390698 | -3.67837182448353 | 1.61034012599495  |
| H | 0.27951793520346  | -3.99865877186657 | 1.33279495221060  |
| O | 1.31082037093506  | 1.47788875825260  | -0.05866251984013 |
| O | 2.42640477604381  | 3.13763616142982  | -2.44288408095664 |

**Table S21.** Energies in a.u.

| Name                   | $\omega$ B97XD3/def2-SVP |                   |                        |         |                | $\omega$ B97XD3/def2-TZVP | $\omega$ B97XD(COSMO)/def2-SVP |
|------------------------|--------------------------|-------------------|------------------------|---------|----------------|---------------------------|--------------------------------|
|                        | Total Energy             | Gibbs Free Energy | Free energy correction | ZPE     | NImag          | Total Energy              | Total Energy                   |
| <b><sup>4</sup>R</b>   | -3679.09631              | -3678.60242       | 0.49389                | 0.56210 | 0              | -3681.52526               | -3679.13534                    |
| <b><sup>4</sup>TS1</b> | -3679.04955              | -3678.55595       | 0.49360                | 0.56071 | 1              | -3681.47927               | -3679.09579                    |
| <b><sup>4</sup>I1</b>  | -3679.06187              | -3678.56484       | 0.49702                | 0.56340 | 0              | -3681.49114               | -3679.10815                    |
| <b>MECP</b>            | -3679.06172              | -3678.56242       | 0.49887                | 0.56289 | 0              | -3681.49090               | -3679.10801                    |
| <b><sup>2</sup>TS2</b> | -3679.03478              | -3678.53526       | 0.49952                | 0.56271 | 2 <sup>a</sup> | -3681.47238               | -3679.09289                    |
| <b><sup>2</sup>I2</b>  | -3679.08869              | -3678.58328       | 0.50541                | 0.56709 | 1              | -3681.51859               | -3679.13649                    |
| <b><sup>2</sup>TS3</b> | -3679.06649              | -3678.55850       | 0.50799                | 0.56945 | 1              | -3681.49637               | -3679.11522                    |
| <b><sup>2</sup>I3</b>  | -3679.08807              | -3678.58355       | 0.50452                | 0.56634 | 1              | -3681.51870               | -3679.13453                    |
| <b><sup>2</sup>TS4</b> | -3679.05869              | -3678.55838       | 0.50031                | 0.56282 | 1              | -3681.48855               | -3679.10713                    |
| <b><sup>2</sup>P</b>   | -3679.21551              | -3678.71977       | 0.49574                | 0.56141 | 1              | -3681.65828               | -3679.26766                    |

<sup>a</sup>The value of the second negative frequency is very small,  $-14.54 \text{ cm}^{-1}$  and hence ignored.
